# Supplementary material for: The Misalignment between the Strategic Asset Allocation and ESG Investment Target of Institutional Investors
Source: Preprints.org preprint supplement (doi:10.20944/preprints202407.0602.v1), 2024-07-08
Supplement: Supplementary file 2 [file supplementary]

## Sheet: data
date	st_dj_all	st_dj_dm	st_dj_em	st_dj_all_esg	st_dj_dm_esg	st_dj_em_esg	st_ms_all	st_ms_dm	st_ms_em	st_ms_all_esg	st_ms_dm_esg	st_ms_em_esg	bd_bb_all	bd_bb_tr	bd_bb_co	bd_bb_all_esg	bd_bb_tr_esg	bd_bb_co_esg	us_ffr	us_tr_1y	us_tr_2y	us_tr_3y	us_tr_5y	us_tr_7y	us_tr_10y
2013-12-29	312.74	315.84	290.42	1262.18	1113.02	947.54	406.81	1654.16	997.56		101.41	1249.92	453.198	208.784	228.463	126.627	97.7258	144.251	0.1	0.1	0.4	0.8	1.7	2.4	3
2014-01-05	311.18	314.65	286.23	1251.25	1103.69	927.65	404.24	1646.05	979.49		100.96	1233.92	452.882	208.659	228.501	126.516	96.9445	144.23	0.1	0.1	0.4	0.8	1.7	2.4	3
2014-01-12	312.64	316.66	283.87	1256.15	1108.67	913.23	405.83	1655.11	970.15		101.63	1222.98	455.728	209.956	230.175	127.293	96.9445	145.263	0.1	0.1	0.4	0.8	1.6	2.3	2.9
2014-01-19	313.07	317.07	284.39	1262.1	1113.9	912.71	406.41	1657.32	972.27		101.62	1231.28	455.477	209.768	230.159	127.216	96.9445	145.239	0.1	0.1	0.4	0.8	1.6	2.3	2.8
2014-01-26	305.8	309.71	277.84	1229.5	1084.94	889.5	396.88	1618.36	949.9		99.17	1201.36	459.196	212.01	231.213	128.335	96.9445	145.924	0.1	0.1	0.3	0.7	1.5	2.2	2.7
2014-02-02	302.15	306.06	274.12	1213.86	1071.36	876.2	391.92	1598.46	936.53		97.98	1187.61	458.67	211.845	230.936	128.188	97.6583	145.697	0	0.1	0.3	0.7	1.5	2.1	2.6
2014-02-09	304.14	308.27	274.66	1229.11	1085.03	877.87	394.88	1611.78	937.3		98.87	1189.66	460.532	212.618	231.816	128.672	97.6583	146.286	0.1	0.1	0.3	0.6	1.5	2.1	2.7
2014-02-16	311.29	315.62	280.36	1260.43	1112.92	896.4	404.18	1650.12	957.31		101.3	1215.81	461.967	213.527	232.594	129.112	97.6583	146.871	0.1	0.1	0.3	0.7	1.5	2.2	2.7
2014-02-23	313.26	317.74	281.24	1267.77	1119.55	893.78	406.4	1659.85	959.26		101.96	1223.1	461.917	213.279	233.039	129.054	97.6583	147.141	0.1	0.1	0.3	0.7	1.5	2.2	2.7
2014-03-02	316.23	320.86	283.15	1279.11	1129.55	900.29	410.13	1675.4	966.42		102.9	1242.46	465.096	214.811	234.701	129.944	99.0805	148.181	0.1	0.1	0.3	0.7	1.5	2.1	2.6
2014-03-09	317.53	322.2	284.17	1276.29	1126.31	908.78	411.41	1681.17	966.72		103.3	1253.08	463.434	213.959	233.756	129.448	99.0805	147.655	0.1	0.1	0.4	0.8	1.6	2.3	2.8
2014-03-16	309.83	314.6	275.82	1244.58	1098.19	888.25	401.35	1641.13	937.69		100.92	1219.84	467.042	215.956	235.246	130.504	99.0805	148.591	0.1	0.1	0.3	0.7	1.5	2.1	2.7
2014-03-23	311.92	316.72	277.64	1259.97	1111.32	899.91	404.36	1653.38	944.96		101.47	1219.2	463.437	214.096	233.804	129.454	99.0805	147.62	0.1	0.1	0.4	0.9	1.7	2.3	2.7
2014-03-30	314.29	318.04	287.36	1279.16	1126.25	956.93	407.95	1661.84	984.91		102.04	1269.04	464.485	214.396	234.733	129.712	99.0805	148.192	0.1	0.1	0.5	0.9	1.7	2.3	2.7
2014-04-06	317.48	320.95	292.49	1293.61	1138.6	972.48	411.86	1676.25	1002.04		102.88	1286.28	464.18	214.056	234.899	129.59	99.0063	148.271	0.1	0.1	0.4	0.9	1.7	2.3	2.7
2014-04-13	311.27	313.38	295.79	1277.32	1122.72	995.25	404.14	1638.43	1015.44		100.75	1305.13	469.832	217.024	237.465	131.224	99.0063	149.92	0.1	0.1	0.4	0.8	1.6	2.2	2.6
2014-04-20	316.54	319.5	295.14	1294.55	1138.35	989.9	411.05	1670.6	1011.87		102.68	1303.97	468.238	216.352	236.674	130.772	99.0063	149.417	0.1	0.1	0.4	0.9	1.7	2.3	2.7
2014-04-27	315.91	319.49	290.16	1294.9	1139.24	975.59	410.28	1670.76	993.35		102.58	1285.7	469.168	216.644	237.529	131.023	99.0063	149.955	0.1	0.1	0.4	0.9	1.7	2.3	2.7
2014-05-04	319.22	322.89	292.77	1306.41	1148.74	995	414.72	1688.99	1003.39		103.62	1300.61	470.914	217.314	238.78	131.49	100.013	150.745	0.1	0.1	0.4	0.9	1.7	2.2	2.6
2014-05-11	318.12	321.55	293.39	1304.98	1147.39	998.72	413.64	1683.36	1006.95		103.41	1303.23	470.9	217.383	238.407	131.48	100.013	150.506	0.1	0.1	0.4	0.9	1.6	2.2	2.6
2014-05-18	318.8	321.32	300.45	1308.95	1150.44	1014.07	414.8	1683.69	1031.95		103.45	1336.73	472.434	218.013	239.44	131.926	100.013	151.12	0.1	0.1	0.4	0.8	1.6	2.1	2.5
2014-05-25	321.9	324.28	304.49	1311.28	1153.19	1012.37	418.41	1697.94	1042.92		104.31	1347.22	471.068	217.204	238.829	131.513	100.013	150.721	0.1	0.1	0.3	0.8	1.5	2.1	2.5
2014-06-01	324.34	327.62	300.64	1321.05	1163.29	988.64	421.53	1715.18	1027.69		105.37	1325.14	472.824	217.969	239.885	131.986	100.339	151.354	0.1	0.1	0.4	0.8	1.5	2.1	2.5
2014-06-08	328.54	331.66	305.95	1335.05	1174.95	1012.32	426.53	1734.47	1044.93		106.53	1344.52	471.579	217.443	238.956	131.6	100.339	150.798	0.1	0.1	0.4	0.8	1.6	2.2	2.6
2014-06-15	327.47	330.27	307.13	1330.71	1169.48	1025.01	425.12	1727.21	1049.14		106.06	1358.37	471.028	217.167	238.844	131.467	100.339	150.69	0.1	0.1	0.5	0.9	1.7	2.2	2.6
2014-06-22	330.75	334.23	305.67	1340.53	1178.38	1024.43	429.32	1747.43	1043.86		107.24	1357.87	471.79	217.423	239.184	131.687	100.339	150.927	0.1	0.1	0.5	0.9	1.7	2.2	2.6
2014-06-29	329.93	333.06	307.25	1333.64	1172.5	1016.62	427.98	1740.86	1046.18		106.87	1362.47	475.298	219.37	240.608	132.686	100.339	151.823	0.1	0.1	0.5	0.9	1.6	2.1	2.5
2014-07-06	334.4	337.47	312.2	1351.65	1188.05	1034.07	433.65	1763.44	1062.4		108.27	1388.75	473.197	218.36	239.53	132.106	101.147	151.181	0.1	0.1	0.5	1	1.7	2.2	2.6
2014-07-13	329.25	331.86	310.22	1325.98	1164.01	1040.33	427.48	1736.02	1058.67		106.62	1384.74	475.566	219.508	240.859	132.787	101.147	151.973	0.1	0.1	0.5	0.9	1.6	2.1	2.5
2014-07-20	330.63	333.21	311.83	1335.25	1172.31	1051.07	429.5	1744.31	1063.26		107.11	1387.66	475.297	219.443	240.765	132.701	101.147	151.875	0.1	0.1	0.5	1	1.7	2.1	2.5
2014-07-27	331.87	333.91	316.75	1340.82	1176.64	1070.85	431.05	1748.25	1078.69		107.33	1409.46	474.649	219.058	240.75	132.495	101.147	151.835	0.1	0.1	0.5	1	1.7	2.1	2.5
2014-08-03	324.08	325.83	311.08	1303.44	1144.23	1042.68	420.91	1705.76	1060.13		104.77	1393.91	473.234	218.288	240.063	132.1	99.9672	151.416	0.1	0.1	0.5	0.9	1.7	2.2	2.5
2014-08-10	321.03	322.89	307.18	1285.07	1127.82	1032.21	416.94	1690.59	1045.51		103.79	1380.12	474.73	219.244	240.544	132.561	99.9672	151.706	0.1	0.1	0.4	0.9	1.6	2.1	2.4
2014-08-17	326.16	327.6	315.23	1301.25	1141.14	1064.46	423.41	1714.26	1074.51		105.32	1422.29	476.148	219.746	241.645	132.906	99.9672	152.367	0.1	0.1	0.4	0.9	1.5	2	2.3
2014-08-24	330.12	331.75	317.85	1315.45	1153.32	1076.73	428.55	1735.96	1083.07		106.69	1432.02	472.516	217.577	240.403	131.83	99.9672	151.541	0.1	0.1	0.5	1	1.7	2.1	2.4
2014-08-31	332.39	334.14	319.28	1329.06	1163.5	1107.81	431.55	1748.69	1087.88		107.48	1440.57	474.56	218.606	241.57	132.411	100.519	152.248	0.1	0.1	0.5	0.9	1.6	2	2.3
2014-09-07	332.99	334.4	322.22	1331.49	1165.63	1114.07	432.37	1750.63	1096.83		107.61	1455.24	469.708	216.018	238.993	130.985	100.519	150.621	0.1	0.1	0.5	1	1.7	2.1	2.5
2014-09-14	328.19	330.27	312.85	1314.91	1154.03	1054.1	426.17	1729.5	1061.53		106.15	1406.65	464.238	212.881	236.93	129.416	100.519	149.35	0.1	0.1	0.6	1.1	1.8	2.3	2.6
2014-09-21	329.38	331.93	310.8	1321.82	1159.97	1051.46	428.2	1740.32	1053.92		106.8	1406.08	463.046	211.96	237.046	129.027	100.519	149.377	0.1	0.1	0.6	1.1	1.8	2.3	2.6
2014-09-28	322.78	325.62	301.82	1288.43	1130.99	1016.04	419.75	1707.87	1023.91		104.76	1366.88	462.2	211.642	236.362	128.798	100.519	148.906	0.1	0.1	0.6	1.1	1.8	2.2	2.5
2014-10-05	316.31	319.1	295.64	1254.13	1101.64	991.93	411.43	1675.29	997.27		102.73	1336.65	460.272	210.449	235.969	128.21	96.993	148.574	0.1	0.1	0.6	1	1.7	2.2	2.4
2014-10-12	307.48	309.42	293.61	1217.27	1066.73	997.39	400.45	1626.68	989.87		99.7	1330.96	464.944	212.959	238.045	129.559	96.993	149.906	0.1	0.1	0.4	0.9	1.5	2	2.3
2014-10-19	305.21	307.33	289.89	1213.72	1064.08	990.17	396.99	1613.56	976.76	1206.11	99.02	1319.07	468.232	214.753	239.166	130.523	96.993	150.637	0.1	0.1	0.4	0.8	1.4	1.9	2.2
2014-10-26	314.71	317.73	292.23	1245.68	1095.15	979.71	409.23	1667.88	984.38	1243.22	102.28	1330.61	465.632	213.195	238.19	129.758	96.993	150.007	0.1	0.1	0.4	0.8	1.5	1.9	2.3
2014-11-02	322.53	325.4	301.25	1273.34	1118.53	1031.29	419.45	1708.09	1016.07	1275.03	104.74	1381.16	461.381	210.487	236.921	128.477	96.8801	149.216	0.1	0.1	0.5	0.9	1.6	2	2.3
2014-11-09	321.33	324.9	294.51	1261.02	1108.76	1008.86	417.95	1707.01	987.65	1271.68	104.66	1347.75	457.999	208.229	236.246	127.472	96.8801	148.781	0.1	0.1	0.5	0.9	1.6	2	2.3
2014-11-16	323.13	326.74	296.02	1269.03	1116.79	1011.01	420.32	1717.2	990.81	1280.57	105.31	1362.12	458.056	208.047	236.312	127.467	96.8801	148.887	0.1	0.1	0.5	1	1.6	2	2.3
2014-11-23	326.7	330.26	299.97	1289.86	1133	1047.7	425.31	1737.24	1004.35	1294.18	106.39	1376.28	457.604	207.726	236.05	127.303	96.8801	148.704	0.1	0.1	0.5	0.9	1.6	2	2.3
2014-11-30	327.01	330.77	298.69	1298.8	1142.21	1030.69	425.82	1739.5	1004.72	1296.29	106.55	1377.46	459.697	208.684	237.61	127.868	96.4467	149.673	0.1	0.1	0.5	0.9	1.5	1.9	2.2
2014-12-07	326.23	330.56	293.3	1293.58	1139.18	1002.95	424.75	1738.52	985.68	1293.44	106.52	1348.8	454.327	205.758	235.293	126.313	96.4467	148.219	0.1	0.1	0.6	1.1	1.7	2.1	2.3
2014-12-14	314.34	318.98	278.9	1241.52	1094.89	939.53	408.74	1675.04	938.41	1247.53	102.79	1290.84	460.105	209.103	237.808	128.072	96.4467	149.867	0.1	0.2	0.5	1	1.5	1.8	2.1
2014-12-21	321.41	326.73	280.55	1260.17	1110.87	964.2	418.2	1717	944.6	1276.95	105.34	1306.29	457.065	207.661	236.221	127.18	96.4467	148.837	0.1	0.2	0.6	1.1	1.6	2	2.2
2014-12-28	323.76	329.16	282.26	1266.59	1116.79	963.22	421.27	1729.42	952.53	1284.26	105.96	1309.62	455.331	206.633	235.367	126.607	96.4467	148.266	0.1	0.2	0.7	1.2	1.8	2.1	2.3
2015-01-04	319.97	324.7	283.79	1245.84	1098.18	963.18	415.92	1704.71	953.72	1268.78	104.46	1313.68	455.936	207.009	236.066	126.827	95.5847	148.635	0.1	0.2	0.7	1.1	1.6	1.9	2.1
2015-01-11	316.85	320.95	285.64	1225.09	1079.41	977.36	411.69	1683.8	961.37	1258.14	103.36	1326.33	456.342	207.429	236.433	126.969	95.5847	148.781	0.1	0.2	0.6	0.9	1.4	1.7	1.9
2015-01-18	315.24	319.28	284.49	1230.61	1084.21	976.5	409.62	1675.15	957.46	1255.38	103.12	1323.42	456.624	207.821	236.137	127.109	95.5847	148.52	0.1	0.2	0.5	0.8	1.3	1.6	1.8
2015-01-25	321.8	325.44	294.22	1255.49	1105.23	1016.92	418.25	1707.74	990.89	1280.65	104.93	1378.26	454.183	206.471	235.677	126.347	95.5847	148.123	0.1	0.2	0.5	0.9	1.3	1.6	1.8
2015-02-01	316.17	320.16	285.78	1225.81	1079.97	991.1	410.33	1677.54	961.61	1256.89	103	1349.35	455.809	207.29	237.075	126.817	94.6318	148.995	0	0.1	0.5	0.7	1.2	1.5	1.6
2015-02-08	323.67	328.09	289.89	1254.53	1104.98	1013.65	420.5	1720.55	978.57	1285.26	105.37	1371.62	453.047	205.66	235.465	126.005	94.6318	148.044	0.1	0.2	0.6	1	1.5	1.8	2
2015-02-15	329.13	333.86	292.95	1273.41	1121.68	1015.68	427.79	1752.18	986.65	1304.73	107.07	1377.43	452.967	205.449	235.506	125.957	94.6318	148.076	0.1	0.2	0.6	1	1.5	1.9	2.1
2015-02-22	331.89	337.06	292.26	1284.01	1131.82	1015.08	431.17	1768.09	984.42	1315	107.98	1375.08	451.575	204.752	234.863	125.554	94.6318	147.655	0.1	0.2	0.6	1.1	1.6	1.9	2.1
2015-03-01	332.84	337.99	293.44	1291.97	1138.79	1019.52	432.47	1772.86	990.28	1319.97	108.3	1386.34	452.118	204.815	235.761	125.663	93.5115	148.142	0.1	0.2	0.6	1	1.5	1.8	2
2015-03-08	327.25	332.43	287.51	1262.61	1113.9	977.15	424.86	1741.99	971.23	1298.25	106.45	1358.11	443.263	200.347	231.155	123.128	93.5115	145.121	0.1	0.3	0.7	1.1	1.7	2	2.2
2015-03-15	322.71	328.42	278.89	1237.15	1092.73	941.31	418.58	1719.82	939.56	1280.15	105.15	1314.46	441.102	199.287	230.288	122.494	93.5115	144.411	0.1	0.2	0.7	1.1	1.6	1.9	2.1
2015-03-22	332.76	338.74	286.83	1290.54	1139.66	972.3	431.91	1774.57	969.53	1323.86	108.69	1361.52	448.391	203.124	233.571	124.601	93.5115	146.57	0.1	0.2	0.6	0.9	1.4	1.7	1.9
2015-03-29	327.59	333.35	283.35	1271.53	1123.99	957.34	424.89	1744.82	958.11	1303.9	106.93	1343.21	449.616	203.788	233.992	124.965	93.5115	146.855	0.1	0.2	0.6	0.9	1.4	1.8	2
2015-04-05	330.01	334.69	294.23	1274.51	1124.96	996.75	427.72	1750.26	994.32	1311.34	107.17	1388.83	450.522	204.016	234.995	125.158	92.487	147.447	0.1	0.2	0.5	0.8	1.3	1.6	1.8
2015-04-12	336.24	340.16	306.4	1297.74	1145.68	1022.99	435.93	1779.47	1034.59	1335	108.87	1434.35	446.665	202	233.124	124.068	92.487	146.175	0.1	0.2	0.6	0.9	1.4	1.7	1.9
2015-04-19	334.82	338.46	307.1	1289.41	1138.43	1007.72	434.01	1769.01	1042.68	1326.77	108.06	1437.27	451.273	204.345	235.294	125.442	92.487	147.594	0.1	0.2	0.5	0.8	1.3	1.6	1.9
2015-04-26	340.43	344.2	311.71	1316.12	1160.8	1041.19	441.57	1799.86	1060.5	1348.47	109.71	1466.01	451.768	204.636	235.284	125.573	92.487	147.63	0.1	0.2	0.5	0.8	1.3	1.7	1.9
2015-05-03	337.71	341.57	308.33	1308.33	1154.41	1029.18	438.18	1787.4	1045.99	1338.34	108.99	1438.13	451.109	204.257	234.203	125.379	93.7168	147.154	0.1	0.2	0.6	0.9	1.5	1.9	2.1
2015-05-10	338.56	342.81	306.05	1307.88	1154.15	1018.37	439.28	1794.7	1034.94	1341.41	109.29	1424.52	450.123	203.562	233.951	125.11	93.7168	146.982	0.1	0.2	0.6	0.9	1.5	1.9	2.1
2015-05-17	341.31	345.53	309.13	1318.71	1163.93	1026.18	442.36	1807.06	1043.4	1353.29	110.12	1441.44	453.146	205.115	235.471	125.988	93.7168	148.024	0.1	0.2	0.5	0.9	1.5	1.9	2.1
2015-05-24	340.53	344.83	307.7	1306.94	1154.57	999.92	441.32	1803.5	1037.62	1350.57	109.87	1433.24	445.377	201.066	231.795	123.745	93.7168	145.542	0.1	0.2	0.6	1	1.6	2	2.2
2015-05-31	335.43	340.13	299.43	1283.36	1134.23	963.7	434.51	1779.31	1004.22	1330.16	108.4	1386.67	444.432	200.073	232.444	123.419	91.4428	145.898	0.1	0.2	0.6	0.9	1.5	1.9	2.1
2015-06-07	331.72	336.67	293.79	1264.12	1117.81	943.08	429.38	1760.43	982.14	1312.23	106.96	1360.44	438.887	197.167	229.479	121.868	91.4428	144.161	0.1	0.3	0.7	1.1	1.7	2.2	2.4
2015-06-14	333.19	338.4	293.29	1274.87	1127.3	950.69	431.38	1770.17	979.46	1319.92	107.6	1360.07	442.619	199.382	230.68	122.996	91.4428	144.976	0.1	0.3	0.7	1.1	1.7	2.1	2.4
2015-06-21	333.79	339.24	292.03	1276.44	1128.35	958.76	432.18	1774.88	974.56	1323.65	107.94	1359.64	445.628	201.039	231.71	123.874	91.4428	145.615	0.1	0.2	0.6	1	1.6	2	2.3
2015-06-28	334.09	339.46	292.92	1281.46	1132.49	967	432.75	1776.22	980.63	1325.46	107.97	1370.64	439.731	198.205	228.617	122.163	91.4428	143.629	0.1	0.3	0.7	1.1	1.8	2.2	2.5
2015-07-05	328.21	333.48	287.78	1245.38	1100.22	955.15	425.08	1744.49	964.31	1304.22	106.12	1358.43	440.695	198.716	229.145	122.438	91.2574	143.904	0.1	0.2	0.6	1	1.6	2.1	2.4
2015-07-12	326.44	332.6	279.16	1253.85	1109.11	931.01	423.37	1743.32	932.85	1299.31	106.04	1316.55	440.899	199.046	228.654	122.484	91.2574	143.627	0.1	0.2	0.6	1	1.7	2.1	2.4
2015-07-19	332.81	339.35	282.6	1273.01	1126.49	940.93	431.96	1780.83	941.68	1325.33	108.27	1330.57	438.874	197.788	228.47	121.862	91.2574	143.378	0.1	0.3	0.7	1.1	1.7	2.1	2.3
2015-07-26	325.86	332.71	273.21	1242.41	1100.66	899.36	422.8	1745.5	910.4	1296.27	105.94	1293.93	441.303	199.117	229.576	122.567	91.2574	144.137	0.1	0.3	0.7	1	1.6	2	2.3
2015-08-02	328.56	336.28	269.16	1263.16	1119.33	899.93	426.78	1765.6	901.68	1311.67	107.37	1286.65	443.476	200.159	230.624	123.165	91.0958	144.834	0.1	0.3	0.7	1	1.5	1.9	2.2
2015-08-09	325.13	332.89	265.44	1248.59	1107.53	878.35	422.03	1747.34	885.07	1298.68	106.34	1267.11	441.709	199.192	230.051	122.667	91.0958	144.422	0.1	0.4	0.7	1.1	1.6	1.9	2.2
2015-08-16	323.9	332.38	258.66	1237.65	1098.73	848.94	420.29	1743.89	863.83	1295.68	106.31	1232.47	443.545	200.288	230.353	123.212	91.0958	144.739	0.1	0.4	0.7	1.1	1.6	2	2.2
2015-08-23	306.51	314.81	242.63	1175.77	1043.9	810.75	397.64	1650.96	812.38	1229.31	100.88	1162.55	448.24	202.82	232.292	124.599	91.0958	146.037	0.1	0.4	0.6	0.9	1.4	1.8	2
2015-08-30	307.96	316.36	243.35	1176.5	1043.98	813.6	399.56	1658.07	820.25	1233.1	101.1	1172.24	444.779	201.375	229.678	123.614	91.0958	144.345	0.1	0.4	0.7	1	1.5	1.9	2.2
2015-09-06	296.57	304.65	234.37	1132.57	1004.9	780.71	384.49	1595.71	788.59	1186.31	97.23	1128.06	445.276	201.862	229.983	123.752	91.3112	144.405	0.1	0.4	0.7	1	1.5	1.9	2.1
2015-09-13	302.32	310.64	238.36	1154.45	1024.7	782.02	391.96	1626.99	802.49	1209.67	99.15	1145.74	446.452	202.297	230.764	124.092	91.3112	145.017	0.1	0.4	0.7	1	1.5	1.9	2.2
2015-09-20	304.02	311.7	244.95	1163.8	1032.35	810.67	394.04	1630.69	829.86	1215.99	99.33	1187.67	449.596	203.966	232.088	124.979	91.3112	145.836	0.1	0.3	0.7	1	1.4	1.8	2.1
2015-09-27	296.4	304.51	234.16	1126.79	1000.26	774.28	384.3	1594.7	789.15	1186.6	97.16	1133.36	444.796	201.648	229.584	123.601	91.3112	144.1	0.1	0.3	0.7	1	1.5	1.9	2.2
2015-10-04	298.93	306.78	238.6	1135.67	1007.48	795.31	387.71	1607.13	804.1	1201.4	98.17	1158.82	449.608	204.449	230.957	124.984	91.9854	145.007	0.1	0.2	0.6	0.8	1.3	1.7	2
2015-10-11	311.82	319.36	253.74	1191.24	1056.12	841.95	404.81	1673.77	859.32	1254.25	102.25	1232.89	449.664	204.129	231.632	124.973	91.9854	145.432	0.1	0.2	0.6	0.9	1.4	1.8	2.1
2015-10-18	313.62	321.18	255.4	1197.99	1063	840.85	407.21	1683.55	865.28	1260.51	102.73	1240.97	452.397	205.659	232.792	125.755	91.9854	146.159	0.1	0.2	0.6	0.9	1.4	1.7	2
2015-10-25	317.41	325.33	256.45	1213.39	1077	840.58	412.39	1706.61	868.56	1277.92	104.21	1247.48	447.393	202.811	231.354	124.278	91.9854	145.103	0.1	0.2	0.6	0.9	1.4	1.8	2.1
2015-11-01	316.64	325.08	251.83	1209.64	1074.26	822.49	411.25	1705.8	847.84	1273.74	104.12	1212.39	447.198	202.871	230.953	124.232	92.0267	144.871	0.1	0.3	0.7	1	1.5	1.9	2.1
2015-11-08	316.65	324.88	253.45	1202.59	1067.13	829.66	411.16	1704.39	852.47	1271.4	103.78	1220.8	438.445	197.993	227.405	121.708	92.0267	142.515	0.1	0.4	0.9	1.2	1.7	2.1	2.3
2015-11-15	307.29	315.44	244.64	1164.12	1033.23	801.76	398.78	1654.3	821.12	1237.04	100.98	1181.71	439.881	198.826	228.096	122.12	92.0267	143.016	0.1	0.5	0.8	1.2	1.7	2	2.3
2015-11-22	316.04	324.37	251.99	1197.9	1062.81	836.69	410.4	1702.83	843.48	1275.02	104.06	1216.3	440.839	199.356	228.594	122.401	92.0267	143.316	0.1	0.5	0.9	1.2	1.7	2	2.3
2015-11-29	315.22	324.24	246.04	1193.11	1059.62	808.62	409.05	1700.29	826.36	1271.09	103.87	1194.66	440.406	199.159	228.498	122.269	92.0267	143.217	0.1	0.5	0.9	1.2	1.6	2	2.2
2015-12-06	313.9	323.03	243.91	1187.14	1054.34	795	407.18	1694.78	812.27	1262.62	103.27	1173.84	441.721	199.6	229.216	122.653	90.1204	143.821	0.1	0.6	0.9	1.2	1.7	2.1	2.3
2015-12-13	302.92	312.23	231.63	1148.74	1020.27	751	392.95	1637.83	773.56	1220.7	99.93	1121.89	445.636	202.017	230.536	123.796	90.1204	144.739	0.1	0.7	0.9	1.2	1.6	1.9	2.1
2015-12-20	302.91	311.45	237.37	1148.44	1019.83	770.97	392.85	1633.75	789.71	1220.84	99.67	1149.75	442.56	200.679	228.337	122.938	90.1204	143.287	0.4	0.7	1	1.3	1.7	2	2.2
2015-12-27	309.88	318.82	241.35	1177.69	1046.19	780.48	402.13	1673.3	804.29	1250.5	102.15	1169.4	443.555	201.341	228.43	123.262	90.1204	143.409	0.4	0.6	1	1.3	1.7	2.1	2.2
2016-01-03	307.99	316.94	239.39	1168.77	1038.3	773.04	399.37	1662.79	794.21	1243.98	101.63	1157.63	442.132	200.557	227.708	122.832	90.931	142.887	0.2	0.6	1.1	1.3	1.8	2.1	2.3
2016-01-10	289.18	297.82	222.96	1091.43	969.65	712.68	374.75	1561.47	740.07	1170.99	95.68	1086.21	445.462	202.601	228.816	123.738	90.931	143.594	0.4	0.6	0.9	1.2	1.6	1.9	2.1
2016-01-17	280.8	289.7	212.72	1060.65	942.11	686.03	364.47	1521	709.19	1138.21	93.05	1049.32	446.452	203.441	228.285	124.021	90.931	143.29	0.4	0.5	0.9	1.1	1.5	1.8	2
2016-01-24	283.23	292.4	213.07	1071.97	952.31	693.19	367.97	1536.79	710.66	1150.24	94.07	1053.52	444.43	202.316	226.944	123.494	90.931	142.426	0.4	0.5	0.9	1.1	1.5	1.8	2.1
2016-01-31	288.64	297.36	221.9	1089.16	966.47	737.05	375.02	1562.18	742.37	1172.97	95.63	1104.84	445.963	202.924	227.783	123.895	91.9868	142.931	0.3	0.5	0.8	1	1.3	1.7	1.9
2016-02-07	282.32	290.4	220.37	1064.81	943.71	737.91	366.57	1523.87	739.61	1148.99	93.42	1107.44	453.472	207.503	229.79	126.146	91.9868	144.365	0.4	0.5	0.7	0.9	1.2	1.6	1.8
2016-02-14	274.55	282.63	212.64	1032.33	914.59	714.39	357.07	1486.45	711.24	1119.92	91.17	1062.85	457.227	210.29	229.474	127.327	91.9868	144.297	0.4	0.5	0.7	0.9	1.2	1.5	1.7
2016-02-21	284.66	292.84	221.93	1065.22	943.77	742.3	369.74	1538.17	740.98	1161.55	94.49	1103.35	456.767	209.954	229.67	127.16	91.9868	144.287	0.4	0.5	0.7	0.9	1.2	1.5	1.7
2016-02-28	287.54	296.1	221.96	1070.97	949.09	737.95	373.23	1554.47	740.02	1171.63	95.36	1101.51	454.825	208.79	229.19	126.585	91.9868	143.828	0.4	0.6	0.8	0.9	1.2	1.5	1.8
2016-03-06	298.79	306.78	237.4	1116.5	987.49	805.9	387.33	1608.04	790.97	1216.21	98.64	1173.51	456.679	209.65	230.507	127.104	95.0622	144.663	0.4	0.7	0.9	1	1.4	1.7	1.9
2016-03-13	302.01	310.07	240	1137.33	1005.6	817.03	391.75	1626.17	800.91	1232.19	99.92	1185.33	458.847	210.52	232.632	127.69	95.0622	146.073	0.4	0.7	1	1.2	1.5	1.8	2
2016-03-20	306.4	314.14	246.78	1148.28	1014.66	844.09	397.21	1645.57	826.75	1252.91	101.36	1228.41	466.258	214.703	235.986	129.834	95.0622	148.155	0.4	0.6	0.8	1	1.3	1.7	1.9
2016-03-27	302.2	309.93	242.74	1123.19	992.65	821.02	391.77	1623.71	812.32	1234.58	99.87	1207.29	462.74	212.612	235.272	128.786	95.0622	147.634	0.4	0.6	0.9	1	1.4	1.7	1.9
2016-04-03	305.51	313.05	247.36	1130.5	998.45	841.67	396.01	1640.14	826.19	1248.28	100.79	1228.26	467.449	214.895	237.617	130.11	97.8307	149.173	0.4	0.6	0.7	0.9	1.2	1.5	1.8
2016-04-10	303.97	311.66	244.69	1128.71	997.35	830.91	393.83	1632.2	816.82	1243.91	100.44	1217.5	472.143	217.874	239.151	131.528	97.8307	150.161	0.4	0.5	0.7	0.8	1.2	1.5	1.7
2016-04-17	311.55	319.11	253.23	1165.65	1029.71	865.46	403.58	1670.47	846.7	1274.01	102.74	1257.29	471.224	217.17	239.291	131.245	97.8307	150.158	0.4	0.5	0.7	0.9	1.2	1.5	1.8
2016-04-24	313.99	321.94	252.72	1179.58	1043.08	856.4	406.92	1686.17	845.21	1286.32	103.86	1253.53	467.625	214.62	239.113	130.184	97.8307	150	0.4	0.5	0.8	1	1.4	1.7	1.9
2016-05-01	311.56	319.33	251.64	1168.94	1033.13	865.89	403.34	1670.8	840.19	1274.56	102.78	1245.92	474.441	218.732	241.514	132.167	99.2268	151.553	0.3	0.6	0.8	0.9	1.3	1.6	1.8
2016-05-08	305.57	313.97	241.1	1136.48	1005.26	819.73	395.66	1643.19	805.34	1251.59	101.08	1195.84	474.898	219.241	241.321	132.342	99.2268	151.437	0.4	0.5	0.7	0.9	1.2	1.5	1.8
2016-05-15	303.88	312.36	238.78	1130.7	1000.05	817.8	393.63	1635.92	796.07	1247.32	100.7	1186.77	471.778	216.978	241.037	131.381	99.2268	151.146	0.4	0.5	0.7	0.9	1.2	1.5	1.7
2016-05-22	304.25	313.13	236.26	1129.28	999.28	808.6	393.95	1639.85	785.26	1249.03	100.92	1170.7	467.9	214.977	239.052	130.283	99.2268	149.93	0.4	0.6	0.9	1	1.4	1.6	1.8
2016-05-29	311.15	320.03	243.09	1161.03	1027.59	830.38	402.93	1676.07	808.29	1278.7	103.16	1208.76	468.884	215.603	239.658	130.561	99.2268	150.253	0.4	0.7	0.9	1.1	1.4	1.7	1.9
2016-06-05	312.22	320.89	245.64	1160.49	1026.31	849.56	403.87	1678.58	816.18	1281.53	103.22	1223.88	475.863	219.544	242.466	132.592	97.4239	152.081	0.4	0.6	0.8	0.9	1.2	1.5	1.7
2016-06-12	310.44	318.69	246.95	1142.85	1009.41	859.03	401.37	1665.22	823.82	1274.37	102.37	1240.98	477.458	220.363	243.433	133.031	97.4239	152.635	0.4	0.5	0.7	0.9	1.2	1.4	1.6
2016-06-19	304.57	312.61	242.7	1117.27	986.44	840.97	394.12	1635.78	806.22	1252.23	100.59	1215.46	478.821	221.704	242.84	133.5	97.4239	152.256	0.4	0.5	0.7	0.8	1.1	1.4	1.6
2016-06-26	299.85	307.29	242.48	1098.12	968.96	844.67	388.27	1608.79	805.87	1234.15	98.94	1217.75	479.3	222.613	241.732	133.665	97.4239	151.404	0.4	0.5	0.6	0.7	1.1	1.3	1.6
2016-07-03	309.67	317.17	251.77	1140.34	1005.73	887.37	401.07	1660.26	839.25	1275.28	102.06	1271.55	483.012	224.479	244.107	134.639	101.442	152.841	0.4	0.4	0.6	0.7	1	1.3	1.4
2016-07-10	309.47	317.2	249.85	1131.39	997.8	879.24	400.99	1662.32	828.84	1274.67	102.09	1259.08	485.27	225.844	245.54	135.311	101.442	153.653	0.4	0.5	0.6	0.7	0.9	1.2	1.4
2016-07-17	317.36	324.75	260.15	1169.58	1030.87	922.37	411.22	1700.57	867.84	1307.48	104.42	1320.97	478.868	221.082	244.815	133.356	101.442	153.269	0.4	0.5	0.7	0.8	1.1	1.4	1.6
2016-07-24	318.51	325.96	260.88	1171.95	1032.6	930.73	412.67	1706.97	869.3	1313.22	104.86	1326.55	477.066	219.93	244.781	132.8	101.442	153.169	0.4	0.5	0.7	0.8	1.1	1.4	1.6
2016-07-31	321.46	329.21	261.61	1193.44	1052.19	933.08	416.09	1721.79	873.47	1323.97	105.72	1335.72	485.376	224.954	247.421	135.25	101.933	154.924	0.3	0.5	0.7	0.7	1	1.3	1.5
2016-08-07	320.93	328.1	265.29	1190.8	1048.5	948.69	415.58	1716.65	885.52	1322.53	105.38	1353.26	482.46	223.493	245.642	134.413	101.933	153.805	0.4	0.5	0.7	0.8	1.1	1.4	1.6
2016-08-14	325.23	332.03	272.23	1209.95	1065.26	975.88	421.02	1736.1	910.08	1340.86	106.65	1387.61	486.802	225.783	247.808	135.634	101.933	155.157	0.4	0.5	0.7	0.8	1.1	1.4	1.5
2016-08-21	324.55	331.22	272.53	1207.53	1063.76	968.75	420.12	1731.85	910.34	1338.52	106.39	1384.86	488.158	226.492	248.346	136.018	101.933	155.542	0.4	0.6	0.7	0.9	1.2	1.4	1.6
2016-08-28	323.31	330.15	270.12	1207.17	1063.62	954.49	418.42	1726.08	901.39	1334.6	106.14	1372.49	487.759	226.253	248.29	135.91	101.933	155.512	0.4	0.6	0.8	1	1.2	1.5	1.6
2016-09-04	324.67	331.72	269.91	1210.34	1066.91	949.59	420.17	1734.6	899.61	1338.73	106.49	1370.11	481.955	222.084	247.721	134.154	100.887	155.092	0.4	0.6	0.8	0.9	1.2	1.5	1.6
2016-09-11	320.89	327.09	272.42	1198.53	1056.14	948.5	414.9	1707.94	909.32	1320.29	104.66	1385.89	482.15	222.52	246.686	134.245	100.887	154.474	0.4	0.6	0.8	0.9	1.2	1.5	1.7
2016-09-18	317.87	324.51	266.21	1178.31	1039	919.64	411.18	1696.31	885.45	1309.01	103.97	1349.31	480.515	221.759	245.56	133.793	100.887	153.743	0.4	0.6	0.8	0.9	1.2	1.5	1.7
2016-09-25	324.8	331.22	274.65	1209.89	1065.69	961.86	420.02	1729.7	917.5	1338.21	106.06	1400.94	485.092	224.345	247.638	135.101	100.887	155.018	0.4	0.6	0.8	0.9	1.2	1.4	1.6
2016-10-02	323.54	330.39	270.27	1202.28	1059.5	947.06	418.43	1725.67	903.46	1334.44	105.83	1379.51	485.678	224.7	247.788	135.271	101.848	155.148	0.3	0.6	0.8	0.9	1.2	1.4	1.6
2016-10-09	321.62	327.7	273.96	1196.94	1053.56	961.97	416.14	1712.4	914.81	1324.99	104.79	1395.82	479.048	220.633	245.553	133.304	101.848	153.648	0.4	0.6	0.8	1	1.3	1.5	1.7
2016-10-16	317.77	323.95	269.42	1180.37	1038.43	952.14	411.21	1693.71	897.03	1307.99	103.5	1371.6	474.735	218.046	244.103	132.034	101.848	152.616	0.4	0.7	0.8	1	1.3	1.6	1.8
2016-10-23	319.7	325.51	273.97	1189.59	1046.16	967.63	413.54	1701.16	911.24	1314	103.82	1392.48	474.767	218.109	244.422	132.042	101.848	152.742	0.4	0.6	0.8	1	1.2	1.5	1.7
2016-10-30	317.39	323.18	271.85	1183.31	1040.31	961.77	410.94	1690.96	903.5	1305.56	103.16	1380.29	471.025	215.803	242.849	130.951	101.848	151.776	0.4	0.6	0.9	1	1.3	1.6	1.8
2016-11-06	311.54	317.55	264.48	1161.4	1021.24	940.82	403.1	1660.12	880.12	1283.58	101.48	1347.11	477.082	219.546	244.71	132.761	98.2748	153.054	0.4	0.6	0.8	0.9	1.2	1.5	1.8
2016-11-13	316.42	324.31	255.68	1182.3	1042.92	886.6	409.47	1696.99	849.1	1302.7	103.66	1295.51	464.775	212.492	239.98	129.237	98.2748	149.982	0.4	0.7	0.9	1.2	1.6	1.9	2.2
2016-11-20	316.53	324.6	254.52	1171.56	1032.89	890.51	409.32	1697.35	844.53	1303.3	103.71	1286.92	454.453	206.783	235.832	126.265	98.2748	147.252	0.4	0.8	1.1	1.4	1.8	2.2	2.4
2016-11-27	320.77	329.02	257.43	1186.16	1045.94	897.05	414.96	1720.84	855.78	1319.22	105.04	1294.46	453.142	205.734	236.048	125.868	98.2748	147.43	0.4	0.8	1.1	1.4	1.8	2.2	2.4
2016-12-04	318.79	326.91	256.4	1179.35	1040.37	887.22	412.25	1708.94	853.07	1309.22	104.19	1285.77	454.15	206.131	236.697	126.129	93.6219	147.851	0.4	0.8	1.1	1.4	1.8	2.2	2.4
2016-12-11	328.23	336.72	263.11	1220.92	1077.23	912.49	424.56	1760.12	877.85	1347.22	107.19	1322.37	450.58	203.895	235.638	125.067	93.6219	147.126	0.4	0.8	1.1	1.4	1.9	2.3	2.5
2016-12-18	326.18	335.28	256.65	1216.98	1074.45	888.85	422.3	1754.74	856.4	1340.47	106.86	1291.22	445.219	200.94	234.2	123.501	93.6219	146.188	0.7	0.9	1.3	1.6	2.1	2.4	2.6
2016-12-25	326.35	336.04	252.62	1221.64	1079.03	880.54	422.49	1759.15	841.6	1342.9	107.24	1272.85	447.943	202.44	235.509	124.265	93.6219	147.017	0.7	0.9	1.2	1.5	2	2.3	2.5
2017-01-01	325.72	334.72	259.58	1223.49	1079.63	906.55	421.84	1751.22	862.27	1341.63	106.7	1312.89	451.354	203.873	237.433	125.212	92.6711	148.236	0.5	0.8	1.2	1.5	1.9	2.2	2.4
2017-01-08	332.05	340.8	264.93	1245.45	1098.75	925.57	429.68	1783.1	881.11	1366.07	108.6	1338.24	451.259	203.476	237.934	125.18	92.6711	148.52	0.7	0.8	1.2	1.5	1.9	2.2	2.4
2017-01-15	333.56	342.01	268.57	1249.76	1102.43	936.7	431.55	1788.23	895.98	1368.95	108.65	1358.67	453.433	204.745	238.59	125.805	92.6711	148.931	0.7	0.8	1.2	1.5	1.9	2.2	2.4
2017-01-22	332.47	340.87	267.92	1241.02	1094.21	937.91	430.22	1782.71	893.28	1365.87	108.4	1353.75	452.492	204.358	238.072	125.551	92.6711	148.635	0.7	0.8	1.2	1.5	1.9	2.3	2.5
2017-01-29	336.83	344.93	274.35	1260.81	1110.92	963.27	435.84	1803.39	915.92	1381.67	109.5	1385.03	452.972	204.431	238.624	125.689	92.6711	148.976	0.7	0.8	1.2	1.5	1.9	2.3	2.5
2017-02-05	337.59	345.55	276.14	1262.53	1112.19	970.77	436.45	1805.51	918.87	1383.15	109.52	1394.16	456.048	206.373	239.202	126.599	94.2661	149.373	0.7	0.8	1.2	1.5	1.9	2.2	2.5
2017-02-12	341.28	348.91	282.16	1264.67	1113.49	983.15	439.01	1814.71	930.16	1390.82	110.07	1405.5	454.718	205.349	239.387	126.194	94.2661	149.412	0.7	0.8	1.2	1.5	1.9	2.2	2.4
2017-02-19	343.57	351.36	283.25	1284.09	1130.33	994.91	444.17	1836.5	939.03	1408.48	111.41	1423.93	455.389	205.79	239.711	126.383	94.2661	149.612	0.7	0.8	1.2	1.5	1.9	2.2	2.4
2017-02-26	344.35	352.13	284.1	1282.36	1128.84	995.62	445.32	1840.8	943.52	1412.64	111.66	1429.57	457.937	207.093	241.252	127.11	94.2661	150.53	0.7	0.8	1.1	1.4	1.8	2.1	2.3
2017-03-05	344.99	353.27	281.11	1293.15	1139.43	986.12	446.45	1848.98	931.07	1413.73	111.87	1410.73	453.031	204.529	239.172	125.671	94.6308	149.218	0.7	1	1.3	1.6	2	2.3	2.5
2017-03-12	344.2	352.47	279.09	1299.14	1145.5	977.99	445.52	1845.88	926.14	1411.33	111.67	1406.88	450.889	203.47	237.852	125.085	94.6308	148.453	0.7	1	1.4	1.7	2.1	2.4	2.6
2017-03-19	348.7	356.29	289.69	1315.58	1158.87	1010.92	451.26	1863.08	965.57	1431.08	112.76	1468.15	455.99	206.334	239.648	126.554	94.6308	149.593	0.9	1	1.3	1.6	2	2.3	2.5
2017-03-26	345.99	353.11	290.44	1308.31	1152.05	1013.8	447.72	1845.81	969.13	1421.18	111.78	1476.12	460.082	208.651	241.339	127.703	94.6308	150.654	0.9	1	1.3	1.5	1.9	2.2	2.4
2017-04-02	346.96	354.6	287.68	1313.93	1158.06	992.13	448.87	1853.69	958.37	1426.32	112.31	1453.82	459.304	208.129	241.216	127.475	94.5636	150.541	0.8	1	1.3	1.5	1.9	2.2	2.4
2017-04-09	345.73	352.9	289.83	1305.61	1150.2	995.31	447.26	1845.46	961.61	1420.45	111.69	1458.33	459.692	208.423	241.372	127.592	94.5636	150.611	0.9	1.1	1.3	1.5	1.9	2.2	2.4
2017-04-16	343.53	350.47	289.31	1297.63	1143.11	995.76	444.36	1832.28	960.43	1414.78	111.16	1459.42	463.489	210.393	243.238	128.694	94.5636	151.758	0.9	1	1.2	1.4	1.8	2	2.2
2017-04-23	345.52	352.71	289.44	1302.37	1147.48	991.36	446.54	1842.06	961.78	1422.56	111.72	1469.26	464.396	211.002	243.628	128.954	94.5636	152.017	0.9	1	1.2	1.4	1.8	2.1	2.2
2017-04-30	351.96	359.44	293.76	1341.02	1182.36	998.52	455.17	1878.28	977.96	1448.38	113.74	1488.89	464.481	210.532	244.594	128.92	95.4128	152.69	0.8	1.1	1.3	1.4	1.8	2.1	2.3
2017-05-07	354.86	362.91	292.49	1361.82	1201.14	1002.4	459.17	1896.75	978.27	1460.48	114.69	1493.46	463.896	210.049	244.595	128.714	95.4128	152.723	0.9	1.1	1.3	1.5	1.9	2.2	2.4
2017-05-14	355.18	362.43	298.51	1358.6	1196.71	1023.89	459.6	1892.97	1002.37	1460.08	114.16	1534.46	462.93	209.211	244.926	128.415	95.4128	152.896	0.9	1.1	1.3	1.5	1.8	2.1	2.3
2017-05-21	355.27	362.84	296.32	1360.72	1200.59	993.09	459.64	1894.77	995.67	1462.47	114.36	1524.08	469.221	212.598	247.514	130.201	95.4128	154.583	0.9	1.1	1.3	1.4	1.8	2	2.2
2017-05-28	358.91	366.3	301.22	1370.6	1208.65	1015.59	464.5	1912.21	1017	1479.15	115.4	1562.7	469.713	212.894	247.552	130.332	95.4128	154.601	0.9	1.2	1.3	1.5	1.8	2.1	2.2
2017-06-04	362.83	370.81	300.93	1387.99	1224.61	1010.25	469.35	1935.21	1015.08	1496.92	116.95	1560.36	472.37	214.113	249.315	131.098	97.0036	155.728	0.9	1.2	1.3	1.4	1.7	2	2.2
2017-06-11	361	368.61	301.72	1377.73	1215.33	1004.22	466.84	1922.79	1018.19	1487.86	116.04	1564.97	471.159	213.544	248.5	130.73	97.0036	155.184	0.9	1.2	1.3	1.5	1.8	2	2.2
2017-06-18	360.4	368.47	297.88	1376.35	1214.42	998.65	466.16	1923.24	1003.12	1488.75	116.28	1545.56	472.395	214.09	249.489	131.068	97.0036	155.783	1.2	1.2	1.3	1.5	1.7	2	2.2
2017-06-25	361	368.88	299.84	1379.47	1217.22	993.06	466.98	1925.02	1011.67	1492.3	116.47	1556.21	472.592	214.053	250	131.104	97.0036	156.107	1.2	1.2	1.3	1.5	1.8	2	2.1
2017-07-02	359.68	367.38	299.72	1376.35	1214.7	997.08	465.09	1916.43	1010.8	1486.17	115.88	1556.26	471.255	213.022	249.732	130.718	96.8223	156.004	1.1	1.2	1.4	1.5	1.9	2.1	2.3
2017-07-09	358.71	366.5	298.17	1375.47	1214.55	986.84	463.96	1913.18	1002.48	1481.82	115.62	1541.07	467.756	210.794	248.804	129.709	96.8223	155.429	1.2	1.2	1.4	1.6	1.9	2.2	2.4
2017-07-16	366.17	373.32	310.05	1405.87	1240.35	1028.47	473.78	1948.08	1047.05	1513.89	117.79	1606.74	471.837	212.981	250.624	130.869	96.8223	156.586	1.2	1.2	1.4	1.5	1.9	2.1	2.3
2017-07-23	368.6	375.71	312.78	1414.92	1248.33	1038.21	476.77	1958.77	1060.18	1526.81	118.68	1631.21	477.764	216.084	253.493	132.538	96.8223	158.439	1.2	1.2	1.3	1.5	1.8	2.1	2.2
2017-07-30	368.88	375.67	315.36	1410.95	1244.57	1040.27	477.25	1960.32	1062.97	1526.8	118.62	1634.44	478.314	216.375	253.673	132.698	96.8223	158.589	1.2	1.2	1.3	1.5	1.8	2.1	2.3
2017-08-06	370.22	376.88	317.49	1421.81	1254.02	1048.31	479.07	1967.77	1067.26	1532.02	118.97	1642.73	479.121	216.831	254.044	132.918	98.81	158.841	1.2	1.2	1.4	1.5	1.8	2.1	2.3
2017-08-13	364.22	370.92	311.32	1397.47	1232.12	1041.48	471.33	1937.73	1042.8	1508.64	117.13	1615.21	481.852	218.613	254.327	133.736	98.81	159.061	1.2	1.2	1.3	1.4	1.7	2	2.2
2017-08-20	363.68	369.71	315.57	1399.16	1233.46	1047.44	470.63	1930.41	1059.54	1507.04	116.68	1640.24	481.705	218.503	254.33	133.686	98.81	159.041	1.2	1.2	1.3	1.5	1.8	2	2.2
2017-08-27	367.07	372.51	323.06	1413.26	1245.16	1071.71	475.02	1944.56	1085.37	1521.82	117.55	1679.98	483.545	219.272	255.432	134.197	98.81	159.749	1.2	1.2	1.3	1.5	1.8	2	2.2
2017-09-03	371.08	376.62	326.37	1426.05	1256.54	1079.53	479.9	1965.79	1091.36	1535.52	118.66	1685.31	483.557	219.065	255.673	134.178	100.001	159.893	1.2	1.2	1.3	1.5	1.7	2	2.2
2017-09-10	370.92	376.34	327.05	1431.84	1261.14	1085.02	479.61	1964.52	1091.17	1536.86	118.81	1677.75	489.235	222.369	257.75	135.821	100.001	161.221	1.2	1.2	1.3	1.4	1.6	1.9	2.1
2017-09-17	375.15	380.77	329.84	1450.37	1277.96	1087.97	485.18	1987.72	1102.16	1556.53	120.32	1697.34	484.058	219.092	256.403	134.293	100.001	160.346	1.2	1.3	1.4	1.5	1.8	2	2.2
2017-09-24	376.25	382.2	328.61	1456.41	1283.93	1081.74	486.66	1994.58	1102.25	1562.08	120.79	1697.52	482.785	218.288	256.206	133.909	100.001	160.209	1.2	1.3	1.4	1.6	1.9	2.1	2.3
2017-10-01	376.59	383.47	322.39	1456.31	1284.85	1063.61	486.88	2000.55	1081.72	1562.07	121	1665.59	479.567	216.39	255.34	132.971	98.5514	159.608	1.1	1.3	1.5	1.6	1.9	2.2	2.3
2017-10-08	379.67	385.99	329.34	1465.24	1291.8	1078.87	490.89	2014.02	1103.12	1574.73	121.71	1701.5	477.174	215.045	254.465	132.295	98.5514	159.022	1.2	1.3	1.5	1.6	2	2.2	2.4
2017-10-15	383.12	389.26	334	1483.33	1306.64	1094.8	495.09	2028.01	1125.91	1591.87	122.84	1739.69	481.413	217.226	256.558	133.492	98.5514	160.357	1.2	1.4	1.5	1.6	1.9	2.1	2.3
2017-10-22	383.85	390.41	331.79	1487.95	1311.75	1083.37	496.39	2035.58	1119.69	1593.93	123.1	1728.76	478.202	215.391	255.427	132.564	98.5514	159.647	1.2	1.4	1.6	1.7	2	2.2	2.4
2017-10-29	383.31	390.22	328.8	1483.14	1307.82	1070.17	495.69	2034.6	1110.22	1591.35	122.95	1720.12	475.312	213.95	254.283	131.739	98.5514	158.883	1.2	1.4	1.6	1.7	2	2.3	2.4
2017-11-05	385.82	392.7	331.47	1493	1317.52	1057.09	498.86	2045.47	1126.18	1600.58	123.51	1742.27	477.325	214.79	255.583	132.28	97.7648	159.7	1.2	1.5	1.6	1.7	2	2.2	2.3
2017-11-12	384.89	391.51	332.37	1479.8	1305.14	1054.25	497.86	2040.25	1128.49	1596.89	123.08	1748.31	477.662	215.381	254.671	132.431	97.7648	159.196	1.2	1.5	1.7	1.8	2.1	2.3	2.4
2017-11-19	384.19	390.54	333.62	1476.79	1301.88	1061.13	496.75	2033.18	1136.45	1596.83	122.73	1775.84	480.381	216.973	255.72	133.204	97.7648	159.871	1.2	1.6	1.7	1.8	2.1	2.2	2.3
2017-11-26	389.48	395.83	338.81	1498.37	1320.8	1078.24	503.35	2059.54	1154.26	1615.09	124.01	1805	484.125	218.946	257.517	134.263	97.7648	161.014	1.2	1.6	1.7	1.8	2.1	2.2	2.3
2017-12-03	389.61	397.3	329.52	1494.39	1319.13	1057.34	503.47	2069.37	1115.94	1619.41	124.86	1751.99	483.144	218.301	257.565	133.961	99.0706	161.027	1.2	1.6	1.8	1.9	2.1	2.3	2.4
2017-12-10	389.77	397.73	327.84	1495.84	1320.71	1053.36	504.08	2073.46	1110.78	1621.22	124.98	1752.37	480.852	216.981	256.752	133.286	99.0706	160.48	1.2	1.7	1.8	1.9	2.1	2.3	2.4
2017-12-17	392.06	399.95	330.54	1500.69	1324.61	1066.85	507.08	2085.54	1118.5	1629.18	125.51	1766.42	482.528	217.823	257.806	133.792	99.0706	161.11	1.4	1.7	1.8	1.9	2.2	2.3	2.4
2017-12-24	395.59	402.84	338.53	1510.58	1332.86	1087.9	511.29	2099.59	1141.09	1643.12	126.29	1810.15	480.591	216.828	256.602	133.242	99.0706	160.39	1.4	1.7	1.9	2	2.3	2.4	2.5
2017-12-31	397.24	404.01	343.42	1519.31	1340.17	1104.93	513.03	2103.45	1158.45	1651.14	126.61	1842.94	484.731	218.74	259.015	134.423	99.4441	161.916	1.3	1.7	1.9	2	2.2	2.3	2.4
2018-01-07	407.52	413.92	356.12	1561.4	1376.31	1141.03	526.69	2156.6	1201.01	1692.92	129.71	1898.65	484.256	218.471	258.711	134.268	99.4441	161.745	1.4	1.8	2	2.1	2.3	2.4	2.5
2018-01-14	412.6	419.3	359.08	1574.31	1387.91	1149.62	533.23	2185.31	1208.17	1713.43	131.31	1916.16	485.806	219.67	259.062	134.72	99.4441	161.964	1.4	1.8	2	2.1	2.3	2.5	2.5
2018-01-21	417.04	423.34	366.18	1597.94	1406.4	1188.11	539.27	2207.4	1232.6	1736	132.78	1967	486.921	220.582	259.068	135.064	99.4441	162.027	1.4	1.8	2.1	2.2	2.5	2.6	2.7
2018-01-28	425.41	431.16	378.24	1636.21	1438.78	1237.79	550.32	2248.93	1273.07	1769.94	135.19	2022.68	491.389	223.206	260.789	136.359	99.4441	163.128	1.4	1.8	2.1	2.2	2.5	2.6	2.7
2018-02-04	411.07	416.47	366.55	1580.91	1388.86	1210.23	531.46	2171.54	1230.84	1709.95	130.48	1963.47	486.925	220.924	258.726	135.078	101.177	161.859	1.4	1.9	2.1	2.3	2.6	2.8	2.8
2018-02-11	387.53	393.1	342.26	1488.22	1308.16	1143.36	500.91	2050.9	1142.85	1612.51	123.26	1827.49	484.748	220.436	256.329	134.528	101.177	160.363	1.4	1.9	2.1	2.3	2.5	2.8	2.9
2018-02-18	404.04	409.72	357.72	1551.51	1364.88	1175.59	522.6	2137.91	1199.73	1679.32	128.15	1917.36	489.628	223.609	257.414	135.965	101.177	161.108	1.4	2	2.2	2.4	2.6	2.8	2.9
2018-02-25	405.31	410.42	362.93	1551.77	1363.26	1193.44	524.12	2140.91	1216.43	1684.26	128.32	1940.55	487.504	222.478	256.452	135.368	101.177	160.463	1.4	2	2.2	2.4	2.6	2.8	2.9
2018-03-04	395.8	400.93	353.4	1510.43	1326.42	1171.25	511.34	2089.84	1182.06	1644.02	125.25	1888.14	488.331	223.302	255.963	135.61	100.461	160.166	1.4	2	2.2	2.4	2.6	2.8	2.9
2018-03-11	406.38	412.34	358.06	1551.97	1363.49	1181.32	525.44	2149.32	1207.23	1692.65	129.08	1924.48	487.379	222.661	255.769	135.31	100.461	160.059	1.4	2	2.3	2.4	2.7	2.8	2.9
2018-03-18	404.34	409.9	358.83	1540.68	1353.25	1174.4	522.47	2134.05	1213.14	1684.3	128.21	1930.93	488.805	223.723	255.816	135.74	100.461	160.076	1.4	2.1	2.3	2.4	2.6	2.8	2.8
2018-03-25	387.05	391.71	348.08	1474.19	1293.39	1154.69	499.36	2036.55	1172.1	1612.52	122.52	1866.81	491.778	225.764	256.064	136.609	100.461	160.252	1.7	2	2.3	2.4	2.6	2.7	2.8
2018-04-01	392.08	397.56	347.34	1493.17	1310.59	1159.19	505.81	2066.84	1170.88	1637.38	124.63	1860.64	491.33	225.061	256.863	136.419	101.553	160.724	1.7	2.1	2.3	2.4	2.6	2.7	2.7
2018-04-08	389.52	394.87	345.79	1492.56	1310.54	1154.17	502.32	2052.78	1161.97	1625.81	123.61	1855.22	490.154	224.194	256.76	136.071	101.553	160.65	1.7	2	2.3	2.4	2.6	2.7	2.8
2018-04-15	395.65	401.57	347.8	1517	1333	1158.03	510.52	2088.98	1170.09	1653.05	125.82	1867.26	490.63	224.345	257.302	136.212	101.553	161.008	1.7	2.1	2.4	2.5	2.7	2.8	2.8
2018-04-22	397.36	403.74	346.35	1521.7	1338.14	1152.53	512.74	2099.74	1168.24	1658.15	126.39	1851.36	487.132	222.723	255.151	135.221	101.553	159.659	1.7	2.2	2.5	2.6	2.8	2.9	3
2018-04-29	396	402.81	342.02	1518.06	1335.96	1141.66	511.31	2096.05	1156.3	1654.71	126.29	1822.18	483.627	220.735	253.825	134.209	101.553	158.802	1.7	2.2	2.5	2.6	2.8	2.9	3
2018-05-06	394.25	401.56	336.79	1504.64	1325.68	1106.72	508.83	2089.44	1136.17	1643.29	125.59	1783.59	481.253	219.566	252.379	133.564	99.542	157.865	1.7	2.2	2.5	2.6	2.8	2.9	3
2018-05-13	402.23	409.59	344.32	1529.13	1347.29	1118.41	519.46	2131.96	1164.49	1674.69	127.75	1831.9	481.117	219.321	252.666	133.523	99.542	158.044	1.7	2.3	2.5	2.7	2.8	2.9	3
2018-05-20	399.48	407.52	336.95	1513.66	1335.64	1076.63	515.66	2120.8	1137.75	1663	127.09	1783.43	475.882	216.449	250.456	132.082	99.542	156.622	1.7	2.3	2.5	2.7	2.9	3	3.1
2018-05-27	397.87	405.82	335.96	1500.74	1322.92	1081.24	513.45	2110.8	1136.62	1657.85	126.52	1789.67	477.839	217.488	251.105	132.669	99.542	156.99	1.7	2.3	2.5	2.6	2.8	2.9	2.9
2018-06-03	397.36	405.33	335.35	1489.49	1313.75	1064.7	512.77	2109.19	1130.22	1654.26	126.28	1777.3	478.147	217.559	251.217	132.782	99.4392	157.058	1.7	2.3	2.5	2.6	2.7	2.9	2.9
2018-06-10	402.34	410.84	336.57	1501.23	1324.95	1058.12	519.15	2137.74	1135.39	1676.11	128.03	1786.69	477.84	217.369	251.19	132.733	99.4392	157.061	1.7	2.3	2.5	2.6	2.8	2.9	2.9
2018-06-17	400.68	409.66	331.61	1492.7	1317.57	1040.31	517.21	2134.15	1113.76	1670.57	127.84	1750.73	476.422	216.555	250.79	132.272	99.4392	156.794	1.9	2.3	2.5	2.7	2.8	2.9	2.9
2018-06-24	396.39	405.86	324.13	1479.58	1306.66	1023.6	511.68	2114.9	1088	1653.16	126.67	1712.46	476.935	216.987	250.305	132.438	99.4392	156.505	1.9	2.3	2.5	2.6	2.8	2.9	2.9
2018-07-01	391.2	400.7	318.73	1461.52	1290.99	1015.09	505.2	2089.3	1069.52	1633.78	125.12	1694.2	477.66	217.139	250.784	132.616	98.6963	156.805	1.9	2.3	2.5	2.6	2.7	2.8	2.9
2018-07-08	394.52	404.81	316.63	1482.16	1310.16	1016.13	509.9	2113.74	1059.97	1652.05	126.77	1684.65	479.947	218.229	252.184	133.263	98.6963	157.694	1.9	2.3	2.5	2.6	2.7	2.8	2.8
2018-07-15	398.33	408.48	321.31	1494.83	1320.21	1032.15	515.22	2134.6	1075.64	1669.45	127.98	1712.78	477.877	216.663	252.367	132.611	98.6963	157.79	1.9	2.3	2.6	2.7	2.7	2.8	2.8
2018-07-22	398.88	409.33	319.72	1504.54	1327.05	1050.85	515.89	2139.17	1070.07	1671.81	128.17	1711.59	477.804	216.746	251.895	132.601	98.6963	157.498	1.9	2.4	2.6	2.7	2.8	2.8	2.9
2018-07-29	402.52	412.45	326.85	1526.48	1346.23	1072.29	520.73	2156.11	1092.36	1690.04	129.43	1743.66	476.852	216.188	251.974	132.334	98.6963	157.54	1.9	2.4	2.7	2.8	2.8	2.9	3
2018-08-05	401.51	412.04	321.8	1518.36	1338.25	1073.2	519.53	2155.39	1073.33	1686.07	129.27	1720.68	475.555	215.209	251.974	131.969	98.1999	157.531	1.9	2.4	2.6	2.7	2.8	2.9	3
2018-08-12	398.49	409.13	318.1	1497.95	1321.21	1046.33	515.61	2139.84	1062.37	1671.76	128.13	1705.24	475.049	214.97	251.607	131.846	98.1999	157.281	1.9	2.4	2.6	2.7	2.7	2.8	2.9
2018-08-19	396.4	408.5	306.03	1489.46	1314.56	1027.07	513.08	2138.11	1022.94	1665.41	128.11	1639.2	474.716	214.784	251.526	131.781	98.1999	157.233	1.9	2.4	2.6	2.7	2.7	2.8	2.9
2018-08-26	401.5	413.33	312.89	1508.78	1332.38	1032.78	519.6	2161.61	1050.19	1689.72	129.7	1688.58	477.326	215.853	253.044	132.472	98.1999	158.204	1.9	2.4	2.6	2.7	2.7	2.8	2.8
2018-09-02	404.07	416.2	313.39	1517.37	1340.72	1042.63	522.88	2175.5	1055.96	1699.04	130.43	1691.44	477.363	215.933	252.848	132.512	98.3661	158.08	1.9	2.5	2.6	2.7	2.7	2.8	2.9
2018-09-09	396.3	408.73	303.74	1487.12	1310.8	1034.27	512.97	2137.6	1022.98	1666.98	128.08	1642.66	475.319	215.151	251.417	131.917	98.3661	157.173	1.9	2.5	2.7	2.8	2.8	2.9	2.9
2018-09-16	401.23	414.26	304.42	1510.8	1333.18	1034.43	519.46	2166.59	1028.53	1689.72	129.94	1649	475.414	214.933	252.105	131.908	98.3661	157.604	1.9	2.6	2.8	2.9	2.9	3	3
2018-09-23	407.45	420.5	310.4	1542.55	1361.36	1050.78	527.86	2200.01	1051.44	1716.91	131.97	1679.77	475.706	214.981	252.476	131.963	98.3661	157.853	1.9	2.6	2.8	2.9	2.9	3	3.1
2018-09-30	404.49	417.39	308.54	1528.65	1347.64	1053.9	524.25	2184.01	1047.91	1703.93	130.83	1672.15	473.248	213.393	251.823	131.264	97.0885	157.42	2.2	2.6	2.8	2.9	3	3	3.1
2018-10-07	396.54	410.23	295.26	1504.86	1327.03	1037.29	514.69	2151.42	1000.76	1670.36	128.62	1596.58	468.3	211.11	249.286	129.916	97.0885	155.816	2.2	2.6	2.9	3	3.1	3.2	3.2
2018-10-14	381.09	393.31	290.28	1445.75	1273.96	1028.61	494.76	2063.44	980.09	1603.22	123.15	1560.83	471.091	212.661	250.329	130.749	97.0885	156.494	2.2	2.6	2.9	2.9	3	3.1	3.2
2018-10-21	380.51	393.02	287.67	1449.66	1277.45	1030.25	494.05	2062.34	971.47	1600.73	123.05	1545.87	469.525	212.05	249.179	130.328	97.0885	155.781	2.2	2.7	2.9	3	3	3.1	3.2
2018-10-28	365.65	377.15	280.02	1396.61	1230.53	1004.27	475.11	1981.89	939.55	1542.21	118.51	1492.74	470.823	212.984	249.054	130.72	97.0885	155.714	2.2	2.6	2.8	2.9	2.9	3	3.1
2018-11-04	377.48	388.31	296.24	1427.75	1255.99	1051.41	489.97	2036.7	996.72	1593.7	121.91	1599.11	468.132	211.688	247.671	129.939	96.3565	154.838	2.2	2.7	2.9	3	3	3.1	3.2
2018-11-11	380.77	392.89	290.58	1453.55	1280.6	1049.87	494.48	2063.16	976.17	1615.28	124.01	1568.69	467.958	211.313	248.323	129.886	96.3565	155.269	2.2	2.7	2.9	3	3	3.1	3.2
2018-11-18	376.03	386.93	294.35	1436.21	1264.42	1054.31	488.34	2031.76	986.3	1603.66	122.81	1580.9	469.827	212.395	247.849	130.429	96.3565	155.021	2.2	2.7	2.8	2.8	2.9	3	3.1
2018-11-25	366.53	376.71	289.97	1404.81	1237.07	1035.71	475.3	1975.09	969.17	1565.85	119.73	1561.26	469.532	212.511	247.297	130.357	96.3565	154.689	2.2	2.7	2.8	2.8	2.9	3	3
2018-12-02	378.2	388.9	297.82	1449.77	1276.7	1055.37	490.86	2041.36	994.72	1618.14	123.75	1605.48	469.425	212.412	246.722	130.28	96.8108	154.344	2.2	2.7	2.8	2.8	2.8	2.9	3
2018-12-09	365.16	374.64	293.42	1395.14	1226.73	1046.59	473.88	1965.24	981.37	1561.66	119.07	1580.75	473.523	214.581	248.323	131.436	96.8108	155.372	2.2	2.7	2.7	2.7	2.7	2.8	2.8
2018-12-16	360.62	369.78	291.11	1386.01	1218.41	1042.74	468.51	1942.55	971.9	1544.7	117.71	1568.01	472.015	213.666	248.274	130.974	96.8108	155.316	2.2	2.7	2.7	2.7	2.7	2.8	2.9
2018-12-23	342.46	349.74	286.28	1326.86	1164.31	1032.83	444.76	1834.97	957.33	1472.56	111.65	1547.77	476.104	216.228	249.14	132.14	96.8108	155.882	2.4	2.6	2.6	2.6	2.6	2.7	2.8
2018-12-30	348.51	356.37	288.29	1346.9	1182.17	1048.08	452.69	1870.8	962.63	1498.29	113.67	1563.04	477.777	217.273	249.345	132.617	96.8108	156.006	2.4	2.6	2.5	2.5	2.6	2.6	2.7
2019-01-06	354.08	362.39	290.6	1364.98	1199.16	1061.32	459.94	1904.18	964.97	1522.22	115.72	1562.85	480.9	219.201	250.018	133.543	98.9125	156.415	2.4	2.6	2.5	2.5	2.5	2.6	2.7
2019-01-13	364.75	373.23	299.97	1395.83	1225.48	1090.88	473.26	1957.17	1001.11	1567.03	118.94	1625.39	481.718	219.363	251.115	133.748	98.9125	157.096	2.4	2.6	2.5	2.5	2.5	2.6	2.7
2019-01-20	372.48	381.44	304.22	1429.85	1256.72	1097.32	483.5	2000.76	1018	1599.68	121.49	1649.21	479.508	217.953	251.005	133.084	98.9125	157.031	2.4	2.6	2.6	2.6	2.6	2.7	2.8
2019-01-27	373.46	382.11	307.32	1432.02	1257.68	1109.68	484.53	2001.86	1032.34	1603.46	121.55	1675.31	482.062	219.199	252.877	133.802	98.9125	158.204	2.4	2.6	2.6	2.6	2.6	2.7	2.8
2019-02-03	378.69	387.36	312.36	1438.81	1262.43	1139.05	491.43	2029.55	1050.2	1622.92	122.88	1705.41	484.99	220.324	255.167	134.619	100.437	159.629	2.4	2.6	2.5	2.5	2.5	2.6	2.7
2019-02-10	376.58	385.44	308.96	1430.39	1255.66	1116.84	488.72	2020.53	1036.03	1616.08	122.48	1685.15	483.857	219.486	255.291	134.312	100.437	159.69	2.4	2.5	2.5	2.4	2.4	2.5	2.6
2019-02-17	384.01	394.21	307.13	1462.7	1284.98	1120.9	498.24	2066.59	1030.64	1647.38	125.27	1669.24	482.193	218.462	254.824	133.809	100.437	159.368	2.4	2.5	2.5	2.5	2.5	2.6	2.7
2019-02-24	388.61	398.28	315.22	1480.19	1300.61	1129.51	504.15	2086.97	1058.65	1669.58	126.69	1714.34	483.932	219.234	255.737	134.29	100.437	159.946	2.4	2.5	2.5	2.5	2.5	2.6	2.7
2019-03-03	389.77	399.79	314.03	1482.51	1303.43	1109.39	505.75	2096.35	1051.54	1674.51	127.15	1703.28	482.215	218.06	255.632	133.762	99.3833	159.875	2.4	2.5	2.6	2.5	2.6	2.7	2.8
2019-03-10	381.28	390.75	309.49	1450.06	1274.74	1091.06	494.91	2051.12	1030.13	1639.83	124.38	1674.28	483.404	218.812	255.872	134.105	99.3833	160.027	2.4	2.5	2.5	2.4	2.4	2.5	2.6
2019-03-17	391.71	401.4	318.11	1498.74	1317.87	1116.24	508.72	2108.78	1057.3	1686.47	127.94	1715.5	485.477	219.511	257.606	134.664	99.3833	161.12	2.4	2.5	2.4	2.4	2.4	2.5	2.6
2019-03-24	389.41	398.86	317.55	1480.25	1301	1101.82	505.88	2094.81	1059.63	1674.15	126.79	1722.04	490.108	222.088	259.684	136.001	99.3833	162.417	2.4	2.4	2.3	2.2	2.2	2.3	2.4
2019-03-31	391.47	401.05	318.68	1488.87	1309.23	1102.62	508.55	2107.74	1058.13	1686.54	127.7	1722.95	489.46	221.405	260.146	135.804	100.54	162.709	2.4	2.4	2.3	2.2	2.2	2.3	2.4
2019-04-07	399.56	409.24	325.85	1515.05	1332.73	1115.65	519.04	2149.85	1085.14	1719.02	130.06	1761.73	487.104	219.861	259.601	135.086	100.54	162.366	2.4	2.4	2.3	2.3	2.3	2.4	2.5
2019-04-14	401.22	411.02	326.76	1515.53	1333.42	1110.81	521.29	2159.39	1089.09	1729.88	130.75	1778.55	487.897	220.156	260.504	135.279	100.54	162.94	2.4	2.4	2.4	2.4	2.4	2.5	2.6
2019-04-21	401.3	410.88	328.25	1513.81	1331.05	1111.93	521.69	2160.36	1092.52	1733.39	130.94	1786.48	486.991	219.562	260.472	135.023	100.54	162.909	2.4	2.4	2.4	2.4	2.4	2.5	2.6
2019-04-28	402.85	413.15	324.99	1525.87	1341.83	1112.95	523.74	2173.82	1078.06	1740.99	131.74	1767.21	487.295	219.621	260.95	135.111	100.54	163.19	2.4	2.4	2.3	2.2	2.3	2.4	2.5
2019-05-05	403.76	413.96	326.53	1523.47	1339.49	1112.96	524.85	2177.77	1082.77	1740.4	131.47	1781.03	487.77	219.909	261.054	135.241	99.7721	163.257	2.4	2.4	2.3	2.3	2.3	2.4	2.5
2019-05-12	393.15	403.93	312.41	1489.15	1309.86	1081.37	511.11	2126.32	1033.44	1700.08	128.64	1707.82	490.342	221.522	261.502	136.019	99.7721	163.559	2.4	2.4	2.3	2.2	2.3	2.4	2.5
2019-05-19	389.78	401.58	302.41	1488.47	1312.68	1035.06	506.93	2116.51	996.39	1691.77	128.45	1642.31	489.795	221.12	261.447	135.847	99.7721	163.502	2.4	2.3	2.2	2.1	2.2	2.3	2.4
2019-05-26	385.99	397.57	300.09	1482.5	1307.49	1039.44	501.8	2095.03	986.65	1676.95	127.38	1613.48	491.901	222.405	261.834	136.451	99.7721	163.757	2.4	2.3	2.2	2.1	2.1	2.2	2.3
2019-06-02	378.71	388.54	304.59	1450.24	1275.17	1074.47	492.12	2046.25	998	1645.52	124.4	1636.73	494.619	223.851	263.121	137.245	101.583	164.551	2.4	2.2	1.9	1.9	1.9	2	2.1
2019-06-09	392.01	403.45	306.93	1512.6	1332.25	1088.63	509.76	2126.88	1007.39	1704.89	129.28	1652.27	500.558	226.931	265.942	138.913	101.583	166.329	2.4	2	1.9	1.8	1.9	2	2.1
2019-06-16	392.91	404.2	308.76	1510.51	1330.39	1083.58	511.07	2130.95	1015.08	1709.48	129.53	1661.39	498.857	226.005	265.451	138.403	101.583	166.013	2.4	2	1.8	1.8	1.8	1.9	2.1
2019-06-23	401.83	412.86	319.15	1549.43	1363.24	1129.24	523.31	2178.16	1053.22	1749.87	132.31	1726.01	503.204	228.031	268.456	139.602	101.583	167.874	2.4	1.9	1.8	1.7	1.8	1.9	2.1
2019-06-30	402.28	413.26	319.97	1545.25	1360.08	1127.83	523.44	2178.35	1054.86	1747.74	132.04	1729.44	505.586	228.918	270.368	140.254	103.865	169.083	2.4	1.9	1.8	1.7	1.8	1.9	2
2019-07-07	406.89	418.12	322.84	1559.09	1372.3	1136.57	529.51	2205.57	1059.93	1769.47	133.73	1744.64	503.513	227.908	269.39	139.621	103.865	168.444	2.4	2	1.9	1.8	1.8	1.9	2
2019-07-14	407.39	419.05	320.44	1560.74	1373.41	1137.28	530.48	2212.65	1050.91	1771.05	133.96	1731.84	502.401	227.199	268.898	139.294	103.865	168.136	2.4	2	1.8	1.8	1.9	2	2.1
2019-07-21	404.75	415.83	321.69	1556.17	1368.05	1147.19	527.04	2194.61	1057.49	1758.8	132.68	1752.74	504.652	228.367	269.959	139.927	103.865	168.805	2.4	1.9	1.8	1.8	1.8	1.9	2.1
2019-07-28	407.67	419.58	319.12	1565.56	1377.3	1127.98	531	2215.71	1048.66	1777.55	134.41	1738.78	503.047	227.305	269.952	139.446	103.865	168.778	2.4	2	1.9	1.8	1.8	1.9	2.1
2019-08-04	395.08	407.12	305.98	1522.32	1339.81	1086.72	514.44	2149.99	1003.76	1727.21	130.82	1665.97	507.193	229.801	271.596	140.674	103.145	169.801	2.1	1.8	1.7	1.7	1.7	1.7	1.8
2019-08-11	391.69	404.04	300.62	1515.35	1333.2	1080.82	510.01	2135.34	981.19	1716.24	130.16	1633.16	511.366	232.184	273.348	141.924	103.145	170.913	2.1	1.8	1.6	1.6	1.6	1.7	1.7
2019-08-18	386.68	398.85	296.98	1493.18	1314.73	1052.62	503.68	2108.5	970.27	1697.21	128.6	1618.71	514.052	233.55	275.017	142.657	103.145	171.916	2.1	1.7	1.5	1.4	1.4	1.5	1.6
2019-08-25	384.77	396.61	297.26	1484.12	1306.27	1049.81	500.94	2094.63	973.66	1688.47	127.8	1621.06	514.145	233.5	275.979	142.667	103.145	172.492	2.1	1.7	1.5	1.5	1.4	1.5	1.5
2019-09-01	392.23	404.6	301.03	1510.37	1329.67	1062.7	510.88	2138.52	984.33	1725.18	130.63	1644.79	514.433	233.794	275.745	142.734	105.599	172.32	2.1	1.8	1.5	1.4	1.4	1.5	1.5
2019-09-08	399.62	412.12	307.34	1534.59	1350.73	1087.83	520.83	2178.9	1007.96	1758.83	133.09	1680.36	513.682	233.224	275.454	142.472	105.599	172.128	2.1	1.7	1.5	1.5	1.4	1.5	1.6
2019-09-15	405.34	417.83	313	1547.72	1362.51	1097.83	527.63	2205.81	1026.61	1778.16	134.41	1708.12	506.672	229.509	271.233	140.408	105.599	169.527	2.1	1.9	1.8	1.8	1.8	1.8	1.9
2019-09-22	403.9	416.55	310.55	1549.71	1364.98	1087.82	525.57	2197.55	1021.27	1772.18	134.01	1695.92	509.226	230.689	273.304	141.144	105.599	170.781	1.9	1.8	1.7	1.6	1.6	1.7	1.7
2019-09-29	399.23	412.01	305.37	1536.48	1352.43	1077.48	519.73	2175.54	1001.5	1759.94	133.19	1663.62	509.731	230.988	273.76	141.301	105.599	171.06	1.9	1.8	1.6	1.6	1.6	1.6	1.7
2019-10-06	395.51	407.95	303.8	1512.94	1330.66	1072.62	514.85	2153.82	996.58	1742.58	131.75	1657.5	513.056	232.751	275.593	142.258	103.847	172.203	1.8	1.6	1.4	1.4	1.3	1.4	1.5
2019-10-13	400.27	412.82	307.69	1535.18	1350.46	1087.64	521.14	2179.33	1011.54	1763.84	133.26	1682.92	508.772	230.231	273.546	140.981	103.847	170.97	1.8	1.6	1.6	1.6	1.6	1.6	1.7
2019-10-20	403.63	416.03	311.79	1550.32	1362.8	1104.47	525.25	2195.28	1024.02	1778.56	134.21	1710.78	510.319	230.786	275.033	141.397	103.847	171.924	1.9	1.6	1.6	1.6	1.6	1.7	1.8
2019-10-27	408.56	421.28	314.57	1570.38	1381.1	1103.44	531.77	2222.75	1035.84	1799.55	135.89	1720.08	509.462	230.267	274.885	141.145	103.847	171.817	1.8	1.6	1.6	1.6	1.6	1.7	1.8
2019-11-03	413.89	426.84	318.33	1591.62	1399.74	1115.97	538.76	2252.07	1049.19	1822.68	137.64	1739.23	512.41	231.72	276.534	141.986	104.19	172.871	1.6	1.5	1.6	1.5	1.5	1.6	1.7
2019-11-10	417.17	429.96	322.38	1609.47	1415.86	1123.45	543.24	2268.83	1064.85	1836.01	138.43	1769.49	505.421	227.759	273.25	139.942	104.19	170.78	1.5	1.6	1.7	1.7	1.7	1.9	1.9
2019-11-17	418.66	432.61	317.04	1620.57	1427.06	1105.32	545.23	2282.8	1048.79	1846.4	139.45	1748.55	508.005	228.947	274.925	140.704	104.19	171.835	1.6	1.5	1.6	1.6	1.6	1.7	1.8
2019-11-24	417.12	430.62	318.13	1614.75	1421.54	1103.29	543.33	2273.89	1048.55	1840.69	138.83	1757.79	508.588	229.279	275.312	140.865	104.19	172.061	1.6	1.6	1.6	1.6	1.6	1.7	1.8
2019-12-01	419.89	434.08	316.77	1625.18	1432.3	1089.75	546.7	2292.26	1040.05	1854.98	140.08	1750.21	508.705	229.074	276.16	140.888	103.017	172.582	1.6	1.6	1.6	1.6	1.6	1.7	1.8
2019-12-08	421.14	434.99	319.96	1629.92	1435.15	1105.12	548.12	2296.39	1048.96	1863.41	140.56	1768.42	508.357	228.862	276.095	140.794	103.017	172.549	1.5	1.6	1.6	1.6	1.7	1.8	1.8
2019-12-15	426.46	439.63	328.99	1654.49	1454.14	1144.87	555.38	2319.73	1086.91	1890.52	142.19	1828.96	510.823	229.805	278.138	141.435	103.017	173.832	1.5	1.5	1.6	1.6	1.7	1.8	1.8
2019-12-22	432.22	445.37	334.62	1676.32	1475.03	1150.73	563	2349.87	1107.64	1914.78	143.84	1866.33	508.533	228.454	277.172	140.772	103.017	173.191	1.5	1.5	1.6	1.7	1.7	1.8	1.9
2019-12-29	435.09	448.1	338.16	1688.93	1484.57	1166.14	566.84	2364.9	1118.61	1925.93	144.52	1889.57	510.663	229.416	278.537	141.357	103.017	174.055	1.5	1.5	1.6	1.6	1.7	1.8	1.9
2020-01-05	435.03	447.61	340.61	1683.63	1478.97	1179.04	566.79	2363.12	1123.87	1921.13	144.05	1892.93	513.394	231.027	279.623	142.163	103.382	174.745	1.6	1.5	1.5	1.5	1.6	1.7	1.8
2020-01-12	437.53	450.1	343.05	1690.18	1486.73	1158.82	570.45	2377.62	1133.63	1934.7	145.06	1902.31	510.938	229.388	278.811	141.38	103.382	174.195	1.5	1.5	1.6	1.6	1.6	1.7	1.8
2020-01-19	444.16	457.18	346.73	1716.98	1511.96	1169.99	579.24	2415.51	1146.83	1967.32	147.64	1919.44	510.892	229.077	279.314	141.335	103.382	174.497	1.5	1.6	1.6	1.6	1.6	1.7	1.8
2020-01-26	439.57	453.33	338.07	1699.52	1496.51	1151.82	573.29	2395.31	1119.39	1952.15	146.78	1877.7	513.916	230.772	281.299	142.228	103.382	175.718	1.6	1.5	1.5	1.5	1.5	1.6	1.7
2020-02-02	428.25	442.84	322.52	1664.54	1467.91	1097.27	558.62	2342.41	1062.34	1907.36	143.89	1788.48	518.203	233.324	282.975	143.457	104.561	176.795	1.6	1.4	1.3	1.3	1.3	1.4	1.5
2020-02-09	439.14	454.38	329.06	1722.31	1520.1	1115.99	573.55	2404.75	1091.65	1960.99	147.83	1844.37	514.567	231.005	281.906	142.349	104.561	176.063	1.6	1.5	1.4	1.4	1.4	1.5	1.6
2020-02-16	444.1	459.48	332.89	1736.56	1532.56	1120.54	580.06	2431.36	1106.3	1987.01	149.72	1871.23	513.802	230.607	281.51	142.124	104.561	175.791	1.6	1.5	1.4	1.4	1.4	1.5	1.6
2020-02-23	438.51	453.68	328.83	1716.69	1516.31	1103.09	572.68	2402.8	1084.22	1963.89	148.16	1827.2	514.562	230.567	282.864	142.32	104.561	176.609	1.6	1.4	1.4	1.3	1.3	1.4	1.5
2020-03-01	392.83	404.55	305.43	1537.17	1353.91	1024.47	512.76	2141.12	1005.52	1763.11	132.24	1706.75	521.688	235.344	283.921	144.499	105.556	177.352	1.6	1	0.9	0.9	0.9	1.1	1.2
2020-03-08	393.97	405.88	305.39	1549.36	1366.05	1019.06	514.88	2149.29	1012.08	1773.15	132.99	1713.37	534.586	242.327	290.129	148.263	105.556	181.395	1.1	0.4	0.5	0.6	0.6	0.7	0.8
2020-03-15	343.69	353.45	270.1	1355.06	1194.74	880.14	451.09	1881.64	891.19	1557.7	116.56	1523.72	514.099	233.876	271.287	142.609	105.556	169.853	1.1	0.4	0.5	0.6	0.7	0.9	1
2020-03-22	302.14	309.7	243.37	1225.14	1081.07	774.24	397.12	1650.94	803.23	1372.14	102.18	1383.48	494.711	226.863	249.536	137.22	105.556	156.426	0.3	0.1	0.3	0.4	0.5	0.7	0.8
2020-03-29	332.83	343.78	252.92	1340.47	1186.29	807.88	436.6	1827.17	842.54	1508.53	113.15	1443.96	510.41	234.113	261.393	141.692	105.556	164.016	0.1	0.1	0.2	0.3	0.4	0.6	0.7
2020-04-05	323.25	333.16	249.76	1317.68	1166.95	785.54	425.35	1776.86	831.72	1476.52	110.59	1414.96	508.099	232.392	262.109	141.056	104.49	164.368	0.1	0.1	0.2	0.3	0.4	0.5	0.6
2020-04-12	357.74	370.38	266.71	1436.61	1273.09	852.72	469.87	1971.96	888.16	1628.85	122.45	1515.98	512.462	233.19	269.108	142.186	104.49	168.674	0	0.2	0.2	0.3	0.4	0.6	0.7
2020-04-19	365.03	378.31	269.95	1479.7	1310.74	865.65	480.27	2017.51	901.31	1665.08	125.13	1550.98	515.302	233.944	273.877	143.02	104.49	171.625	0.1	0.2	0.2	0.3	0.4	0.5	0.6
2020-04-26	359.54	372.83	264.67	1452.74	1288.33	839.8	472.62	1987.65	879.41	1636.2	122.98	1518.38	515.165	233.986	273.993	143.026	104.49	171.733	0.1	0.2	0.2	0.3	0.4	0.5	0.6
2020-05-03	364.61	377	274.76	1471.61	1301.96	889.03	478.56	2004.79	916.77	1658.78	124.2	1580.31	519.775	236.227	275.686	144.299	106.161	172.861	0	0.2	0.2	0.2	0.4	0.5	0.6
2020-05-10	373.76	387.67	274.57	1497.95	1328.6	865.64	490.24	2061.89	911.65	1697.85	127.61	1568.11	515.651	235.04	272.978	143.565	106.161	171.077	0	0.1	0.2	0.2	0.3	0.5	0.7
2020-05-17	364.34	377.18	271.84	1466.24	1299.84	851.91	478.35	2008.41	901.16	1663.18	124.69	1557.87	515.383	233.895	272.849	143.029	106.161	170.975	0.1	0.1	0.1	0.2	0.3	0.5	0.6
2020-05-24	375.21	389.69	272.64	1500.54	1331.22	864.74	491.94	2071.9	905.25	1708.3	128.35	1566.7	518.173	234.77	276.42	143.765	106.161	173.154	0.1	0.2	0.2	0.2	0.3	0.5	0.7
2020-05-31	389	404.31	280.95	1554.33	1380.47	880.4	509.47	2147.88	930.35	1768.91	133.08	1604.2	522.293	236.337	280.126	144.901	106.173	175.492	0.1	0.2	0.2	0.2	0.3	0.5	0.7
2020-06-07	412.41	428.01	301.57	1637.02	1450.92	965.35	539	2266.76	1002.65	1863.68	139.74	1727.68	522.421	234.92	283.71	144.827	106.173	177.674	0.1	0.2	0.2	0.3	0.5	0.7	0.9
2020-06-14	394.76	408.26	296.94	1571.3	1390.58	948.16	516.57	2164.46	987.01	1788.1	133.41	1710.99	526.213	237.62	284.234	145.983	106.173	177.988	0.1	0.2	0.2	0.2	0.3	0.5	0.7
2020-06-21	402.31	416.18	302.01	1613.87	1429.92	949.2	526.81	2208.97	1001.36	1824.63	136.16	1740.82	526.059	237.218	285.559	145.917	106.173	178.713	0.1	0.2	0.2	0.2	0.3	0.5	0.7
2020-06-28	393.95	406.55	301.24	1584.54	1403.05	940.28	515.81	2157.19	998.9	1788.17	133.04	1739.58	526.886	237.792	285.55	146.156	106.173	178.756	0.1	0.2	0.2	0.2	0.3	0.5	0.6
2020-07-05	406.27	418.93	312.62	1630.39	1443.28	971.09	532.5	2226.4	1033.09	1850.49	137.48	1810.82	527.767	237.723	287.314	146.397	106.972	179.865	0.1	0.2	0.2	0.2	0.3	0.5	0.7
2020-07-12	412.49	424.21	323.77	1647.31	1456.9	992.15	541.77	2259.6	1069.27	1879.5	138.95	1896	531.364	239.684	289.616	147.457	106.972	181.34	0.1	0.1	0.2	0.2	0.3	0.5	0.6
2020-07-19	417.55	431.05	318.46	1669.96	1475.18	1009.53	548.05	2293.92	1055.06	1902.25	141.14	1871.81	532.681	239.814	291.715	147.792	106.972	182.678	0.1	0.1	0.1	0.2	0.3	0.5	0.6
2020-07-26	417.89	431.17	320.06	1672.5	1475.15	1023.16	547.9	2291.58	1060.47	1906.52	141.21	1895.61	538.746	242.924	295.62	149.537	106.972	185.156	0.1	0.1	0.1	0.2	0.3	0.4	0.6
2020-08-02	420.34	433.34	323.97	1674.32	1471.97	1046.15	551.89	2304.98	1078.92	1907.37	140.85	1930.64	543.739	245.459	298.052	150.985	110.974	186.763	0.1	0.1	0.1	0.1	0.2	0.4	0.5
2020-08-09	429.47	443.67	325.85	1701.17	1497.25	1034.91	563.24	2355.97	1089.32	1946.59	143.96	1948.61	543.462	244.958	298.597	150.843	110.974	187.037	0.1	0.1	0.1	0.1	0.2	0.4	0.6
2020-08-16	434.31	449.17	326.63	1712.62	1508.85	1031.61	569.4	2384.2	1093.16	1966.01	145.64	1942.86	540.312	243.267	296.075	149.898	110.974	185.507	0.1	0.1	0.1	0.2	0.3	0.5	0.7
2020-08-23	435.01	449.51	328.54	1711.37	1508.98	1020.39	570.97	2392.11	1091.85	1973.09	146.1	1950.07	541.519	243.986	296.701	150.259	110.974	185.895	0.1	0.1	0.1	0.2	0.3	0.4	0.6
2020-08-30	446.78	461.65	337.37	1767.5	1559.23	1037.96	586.44	2456.86	1121.6	2032.24	150.32	2018.68	541.852	244.267	295.918	150.358	110.974	185.452	0.1	0.1	0.1	0.1	0.3	0.5	0.7
2020-09-06	437.05	451.17	330.9	1720.97	1516.4	1026.02	573.04	2399.6	1099.5	1981.84	146.48	1973.41	540.963	243.525	296.208	150.072	110.729	185.576	0.1	0.1	0.1	0.2	0.3	0.5	0.7
2020-09-13	431.58	445.79	327.38	1714.53	1509.75	1027.26	565.96	2368.14	1091.79	1965.09	145.17	1960.52	541.644	243.914	296.521	150.257	110.729	185.784	0.1	0.1	0.1	0.2	0.3	0.4	0.7
2020-09-20	432.69	446.69	332.02	1712.79	1506.43	1043.77	567.02	2367.99	1108.53	1974.09	145.64	1983.2	544.576	245.927	297.243	151.102	110.729	186.235	0.1	0.1	0.1	0.2	0.3	0.5	0.7
2020-09-27	423.41	438.03	317.57	1664.14	1465.58	992.04	555.21	2326.85	1059.1	1927.03	142.54	1901.65	539.036	243.256	293.772	149.523	110.729	184.023	0.1	0.1	0.1	0.2	0.3	0.5	0.7
2020-10-04	430.49	445.24	324.34	1689.88	1487.72	1006.38	564.11	2362.41	1081.71	1960.18	144.63	1956.57	541.038	244.187	294.901	150.085	110.232	184.763	0.1	0.1	0.1	0.2	0.3	0.5	0.7
2020-10-11	446.5	461.66	336.29	1747	1536.17	1047.46	584.6	2447.76	1122.51	2031.77	149.65	2041.72	542.875	244.787	296.209	150.516	110.232	185.603	0.1	0.1	0.2	0.2	0.3	0.6	0.8
2020-10-18	444.88	459.74	336.93	1734.06	1525.62	1036.03	583.11	2440.14	1124.08	2026.15	149.16	2046.89	543.434	245.123	296.711	150.674	110.232	185.873	0.1	0.1	0.1	0.2	0.3	0.5	0.7
2020-10-25	444.29	458.51	339.72	1725.62	1516.37	1053.33	581.91	2430.54	1136.45	2019.71	148.31	2071.3	543.803	245.317	296.517	150.772	110.232	185.813	0.1	0.1	0.2	0.2	0.4	0.6	0.8
2020-11-01	420.84	432.79	330.49	1620.13	1422.33	999.51	551	2292.93	1103.46	1917.53	140.03	2031.39	541.475	244.473	294.638	150.116	110.107	184.581	0.1	0.1	0.2	0.2	0.4	0.6	0.9
2020-11-08	452.62	466.01	351.19	1760.28	1547.65	1063.4	592.76	2470.05	1176.36	2059.76	150.77	2149.67	548.496	247.802	299.336	152.08	110.107	187.545	0.1	0.1	0.2	0.2	0.4	0.6	0.8
2020-11-15	463	477.45	354.13	1810.31	1591.08	1102.56	605.92	2529.29	1188.35	2101.17	154.37	2137.42	545.898	246.016	298.91	151.259	110.107	187.232	0.1	0.1	0.2	0.2	0.4	0.7	0.9
2020-11-22	466.28	480.46	360.73	1808.93	1586.45	1124.74	609.52	2540.02	1209.26	2110.72	154.71	2174.87	549.799	247.884	301.986	152.376	110.107	189.097	0.1	0.1	0.2	0.2	0.4	0.6	0.8
2020-11-29	477.34	492.48	365.92	1841.52	1615.91	1139.51	623.76	2601.45	1230.72	2159.9	158.53	2203.33	551.297	248.471	303.209	152.798	110.107	189.887	0.1	0.1	0.2	0.2	0.4	0.6	0.8
2020-12-06	484.65	500.44	369.9	1866.81	1634.72	1180.49	633.09	2639.66	1251.04	2181.86	160.15	2219.77	553.006	249.107	304.143	153.232	111.962	190.539	0.1	0.1	0.2	0.2	0.4	0.7	1
2020-12-13	482.74	497.37	371.3	1847.63	1613.66	1200.96	629.83	2621.89	1257.66	2170.9	158.97	2237.87	554.921	250.296	304.808	153.801	111.962	190.93	0.1	0.1	0.1	0.2	0.4	0.6	0.9
2020-12-20	489.98	505.59	376.11	1874.51	1638.89	1212.61	639.8	2666.3	1268.36	2204.41	161.69	2247.73	556.704	251.105	305.666	154.295	111.962	191.506	0.1	0.1	0.1	0.2	0.4	0.7	0.9
2020-12-27	488.69	504.76	371.37	1867.04	1631.9	1200.14	637.46	2659.27	1255.2	2189.37	161.06	2191.56	555.933	250.549	305.66	154.041	111.962	191.458	0.1	0.1	0.1	0.2	0.4	0.6	0.9
2021-01-03	495.15	510.55	380.99	1894.46	1654.81	1215.57	646.3	2690.04	1291.75	2225.71	163.38	2254.35	558.725	251.946	307.404	154.857	113.766	192.554	0.1	0.1	0.1	0.2	0.4	0.6	0.9
2021-01-10	508.15	523.71	395.45	1939.7	1689.56	1261.67	663.59	2753.31	1353.53	2289.22	167.54	2356.41	556.131	250.615	304.736	154.038	113.766	191.019	0.1	0.1	0.1	0.2	0.5	0.8	1.1
2021-01-17	503.05	516.78	398.03	1918.53	1667.58	1254.31	655.86	2714.81	1358.03	2266.04	164.99	2402.27	554.168	249.46	304.263	153.457	113.766	190.618	0.1	0.1	0.1	0.2	0.5	0.8	1.1
2021-01-24	510.98	524.24	408.04	1944.03	1687.4	1238	666.69	2755.66	1392.85	2303.98	167.03	2500.64	554.753	249.619	304.761	153.643	113.766	190.969	0.1	0.1	0.1	0.2	0.4	0.8	1.1
2021-01-31	492.71	506.09	391.72	1889.02	1644.88	1193.76	642.91	2661.69	1329.57	2227.59	161.82	2389.03	553.805	249.031	304.35	153.332	112.296	190.699	0.1	0.1	0.1	0.2	0.4	0.8	1.1
2021-02-07	514.57	527.8	410.99	1938.01	1684.46	1245.15	670.56	2773.45	1395.35	2326.76	168.76	2515.84	549.719	246.74	302.53	152.115	112.296	189.573	0.1	0.1	0.1	0.2	0.5	0.8	1.2
2021-02-14	524.24	536.88	422.6	1966.92	1710.94	1258.33	682.24	2818.85	1428.87	2363.28	171.16	2572.27	551.335	247.623	303.189	152.565	112.296	190.039	0.1	0.1	0.1	0.2	0.5	0.8	1.2
2021-02-21	522.48	534.77	423.35	1956.17	1698.02	1267.22	679.74	2806.47	1430.03	2355.3	170.54	2561.83	547.862	245.599	301.639	151.595	112.296	189.126	0.1	0.1	0.1	0.2	0.6	1	1.3
2021-02-28	504.74	519.52	397.03	1905.44	1657.55	1224.04	657.15	2726.91	1339.26	2275.52	165.84	2379.11	544.272	243.541	300.131	150.565	109.641	188.206	0.1	0.1	0.1	0.3	0.7	1.1	1.4
2021-03-07	505.64	519.83	397.2	1908.48	1659.92	1244.78	657.49	2728.56	1339.31	2277.8	165.89	2387.45	538.75	240.998	295.862	148.971	109.641	185.55	0.1	0.1	0.1	0.3	0.8	1.2	1.6
2021-03-14	519.02	534.94	399.84	1962.09	1707.68	1267.92	674.47	2807.21	1348.2	2335.82	170.6	2403.4	537.733	240.489	294.949	148.672	109.641	185.015	0.1	0.1	0.1	0.3	0.8	1.3	1.6
2021-03-21	516.67	533.17	396.35	1962.58	1711.75	1261.05	671.41	2796.14	1336.84	2325.44	169.92	2381.59	536.538	239.978	294.231	148.336	109.641	184.56	0.1	0.1	0.2	0.3	0.9	1.4	1.7
2021-03-28	517.58	535.8	386.89	1981.91	1730.56	1247.26	673.35	2814.86	1307.48	2343.54	171.96	2337.02	536.145	239.685	294.615	148.224	109.641	184.732	0.1	0.1	0.1	0.3	0.9	1.3	1.7
2021-04-04	523.3	540.98	395.15	1991.54	1737.3	1260.14	681.03	2841.89	1338.23	2373.38	173.74	2388.84	534.29	238.265	295.246	147.679	107.134	185.044	0.1	0.1	0.2	0.4	1	1.4	1.7
2021-04-11	533.27	553.16	393.22	2033.49	1775.16	1273.66	694.71	2910.1	1330.36	2416.18	177.5	2374.47	537.474	239.79	296.882	148.6	107.134	186.088	0.1	0.1	0.2	0.3	0.9	1.3	1.7
2021-04-18	541.22	561.63	397.24	2068.32	1806.86	1304.28	704.94	2953.35	1348.69	2454.3	180.22	2414.87	540.583	241.385	298.332	149.455	107.134	186.958	0.1	0.1	0.2	0.3	0.8	1.3	1.6
2021-04-25	540.42	560.17	400.02	2069.42	1807.73	1309.82	703.72	2946.11	1353.02	2452.68	180.02	2416.41	542.494	242.454	299.227	150.002	107.134	187.544	0.1	0.1	0.2	0.3	0.8	1.3	1.6
2021-05-02	538.95	558.55	400.13	2049.27	1785.62	1331.84	701.83	2938.76	1347.61	2440.58	178.98	2411.55	540.545	241.031	298.608	149.41	108.653	187.178	0	0	0.2	0.3	0.8	1.3	1.6
2021-05-09	545.72	566.04	399.79	2092.45	1826.74	1353.03	710.36	2979.41	1348.57	2477.11	182.1	2403.68	543.98	242.698	300.68	150.403	109.587	188.453	0.1	0	0.1	0.3	0.8	1.2	1.6
2021-05-16	536.56	557.73	387.96	2071.93	1815.19	1303.76	699.13	2938.63	1307.53	2433.77	179.43	2309.13	541.465	241.282	299.387	149.656	108.796	187.689	0.1	0	0.1	0.3	0.8	1.3	1.6
2021-05-23	538.27	558.68	395.35	2079.94	1819.16	1324.32	701.57	2943.13	1330.04	2443.58	179.61	2356.14	543.095	242.218	300.185	150.12	109.19	188.18	0.1	0	0.2	0.3	0.8	1.3	1.6
2021-05-30	546.28	565.82	405.32	2098.59	1831.74	1356.66	711.15	2979.3	1360.78	2477.21	181.75	2410.85	544.522	242.647	301.451	150.448	109.271	188.942	0	0	0.1	0.3	0.8	1.3	1.6
2021-06-06	550.07	569.3	411.82	2109.04	1839.32	1385.67	716.31	2997.36	1381.56	2496.56	182.81	2454.28	544.887	242.864	301.945	150.582	109.427	189.228	0.1	0	0.1	0.3	0.8	1.2	1.6
2021-06-13	552.61	572.31	412.3	2128.54	1855.92	1396.39	719.52	3012.67	1381.99	2509.8	183.82	2462.34	546.49	243.6	303.487	151.018	109.69	190.101	0.1	0	0.1	0.3	0.7	1.1	1.5
2021-06-20	541.52	560.43	405.59	2083.67	1815.32	1360.33	705.97	2954.19	1361.25	2462.6	180	2441.7	541.061	240.674	302.138	149.489	108.081	189.118	0.1	0.1	0.3	0.5	0.9	1.2	1.4
2021-06-27	553.69	573.82	411.78	2115.6	1846.56	1358.95	721.91	3024.94	1379.59	2518.94	184.49	2465.15	540.859	240.453	301.535	149.426	108.192	188.829	0.1	0.1	0.3	0.5	0.9	1.3	1.5
2021-07-04	555.83	576.79	404.46	2120.44	1853.11	1339.95	724.66	3046.09	1355.38	2532.13	186.01	2429.2	540.947	240.371	302.481	149.441	108.049	189.343	0.1	0.1	0.2	0.4	0.9	1.2	1.4
2021-07-11	554.55	577.37	395.13	2117.5	1852.5	1316.55	723.6	3053.12	1318.17	2522.29	186.02	2358.16	543.357	241.805	303.45	150.142	108.662	189.934	0.1	0.1	0.2	0.4	0.8	1.1	1.4
2021-07-18	550.32	571.85	400.46	2110.78	1843.24	1342.93	719.17	3024.66	1340.08	2518.56	185.1	2405.93	544.22	242.323	303.831	150.345	108.733	190.13	0.1	0.1	0.2	0.4	0.8	1.1	1.3
2021-07-25	556.34	580.22	392.5	2127.32	1859.99	1329.14	727.13	3072.38	1311.3	2546.16	187.97	2362.03	544.659	242.465	304.232	150.447	108.766	190.348	0.1	0.1	0.2	0.4	0.7	1	1.3
2021-08-01	554.51	579.94	382.96	2126.21	1859.7	1319.39	724.21	3069.25	1277.8	2537.82	188.11	2291.4	548.007	244.192	305.992	151.401	109.596	191.469	0.1	0.1	0.2	0.3	0.7	1	1.2
2021-08-08	559.77	585.6	385.58	2140.38	1870.55	1325.24	731.19	3098.06	1292.53	2563.15	189.95	2313.94	545.41	243.028	303.968	150.639	108.976	190.223	0.1	0.1	0.2	0.4	0.8	1.1	1.3
2021-08-15	563.47	589.87	385.3	2165.96	1895.98	1324.57	736.02	3125.12	1280.86	2585.6	191.85	2310.55	546.332	243.481	304.61	150.924	109.255	190.61	0.1	0.1	0.2	0.4	0.8	1.1	1.3
2021-08-22	552.65	580.36	367.68	2149.77	1886.02	1283.73	722.58	3080.02	1220.78	2549.36	190.13	2191.37	544.566	242.703	303.823	150.402	108.614	190.075	0.1	0.1	0.2	0.4	0.8	1.1	1.3
2021-08-29	564.71	591.45	383.93	2173.55	1899.13	1352.54	737.24	3133.67	1272.67	2595.33	192.84	2286.65	545.485	242.897	304.513	150.654	108.884	190.53	0.1	0.1	0.2	0.4	0.8	1.1	1.3
2021-09-05	571.83	597.87	396.39	2199.71	1919.8	1369.78	746.46	3163.99	1315.91	2625.55	194.42	2363.22	547.058	243.66	305.091	151.084	109.306	190.922	0.1	0.1	0.2	0.4	0.8	1.1	1.3
2021-09-12	564.58	589.76	395.77	2157.01	1880.6	1355.37	737.28	3122.07	1308.94	2595.55	191.9	2357.29	545.867	242.998	304.761	150.718	108.837	190.701	0.1	0.1	0.2	0.4	0.8	1.1	1.3
2021-09-19	559.68	585.36	386.55	2141.46	1870.24	1325.33	729.99	3096.62	1279.35	2572.71	190.71	2292.72	543.042	241.507	303.792	149.899	107.935	190.069	0.1	0.1	0.2	0.5	0.9	1.2	1.4
2021-09-26	559.99	586.45	382.48	2142.05	1869.77	1328.2	730.46	3103.53	1265.1	2575.32	191.22	2270.09	540.346	239.991	302.594	149.127	107.288	189.332	0.1	0.1	0.3	0.5	0.9	1.3	1.5
2021-10-03	546.22	570.84	378.56	2079.6	1816.24	1306.43	712.44	3022.83	1246.6	2508.49	185.76	2240.99	537.625	238.528	300.812	148.34	106.672	188.255	0.1	0.1	0.3	0.5	0.9	1.3	1.5
2021-10-10	549.26	573.96	383.28	2099.4	1835.18	1297.8	717.49	3043.74	1257.04	2529.85	187.27	2260.28	534.094	236.74	298.296	147.317	105.947	186.741	0.1	0.1	0.3	0.6	1.1	1.4	1.6
2021-10-17	561.17	586.54	390.31	2149.35	1878.66	1325.65	732.95	3109.47	1283.67	2590.22	191.63	2322.11	535.324	236.933	300.015	147.653	106.188	187.741	0.1	0.1	0.4	0.7	1.1	1.4	1.6
2021-10-24	567.92	594.02	392.07	2178.07	1906.31	1306.76	742.26	3151.16	1293.14	2625.71	194.29	2348.05	534.629	236.745	299.036	147.431	106.084	187.147	0.1	0.1	0.5	0.8	1.2	1.5	1.6
2021-10-31	569.54	597.77	383.54	2201.98	1930.41	1296.26	745.23	3174.73	1264.75	2659.76	197.86	2290.16	534.735	236.58	299.974	147.462	105.847	187.626	0.1	0.1	0.5	0.8	1.2	1.5	1.6
2021-11-07	579.1	608.6	384.01	2235.14	1959.45	1310.06	757.13	3232.26	1264.07	2706.13	201.77	2290.82	538.46	238.417	302.194	148.506	106.685	189.006	0.1	0.1	0.4	0.7	1.1	1.3	1.5
2021-11-14	578.88	606.89	391.75	2234.57	1956.54	1328.42	756.83	3223.82	1285.48	2700.12	200.83	2321.23	534.024	236.489	299.199	147.205	105.677	187.124	0.1	0.2	0.5	0.8	1.2	1.5	1.6
2021-11-21	575.98	605.16	385.79	2214.72	1935.74	1323.85	754.92	3219.9	1269.22	2692.25	200.46	2291.51	533.429	236.341	298.42	147.014	105.434	186.61	0.1	0.2	0.5	0.9	1.2	1.5	1.5
2021-11-28	559.64	588.2	371.45	2142.54	1873.11	1281.34	733.53	3131.98	1223.13	2606.8	194.38	2192.37	533.255	236.6	297.627	146.983	105.433	186.085	0.1	0.2	0.5	0.8	1.2	1.4	1.5
2021-12-05	552.35	579.43	370.74	2127.92	1856.61	1292.84	724.18	3086.44	1224.64	2580.62	192.06	2195.42	534.909	237.313	299.234	147.45	105.737	187.023	0.1	0.3	0.6	0.9	1.1	1.3	1.3
2021-12-12	568.47	597.63	375.97	2199.46	1924.36	1296.69	746.26	3188.26	1238.54	2654.06	198.03	2214.6	534.002	236.927	297.93	147.17	105.645	186.318	0.1	0.3	0.7	1	1.3	1.4	1.5
2021-12-19	559.13	588.94	367.63	2170.4	1896.91	1285.56	734.67	3139.75	1216.3	2606.9	194.52	2170.63	534.281	236.906	298.378	147.24	105.624	186.589	0.1	0.3	0.6	0.9	1.2	1.3	1.4
2021-12-26	570.51	601.23	370.26	2212.48	1936.48	1288.12	748.88	3206.85	1220.55	2661.17	199.06	2175.53	532.104	235.56	297.609	146.613	105.072	186.16	0.1	0.3	0.7	1	1.2	1.4	1.5
2022-01-02	575.04	605.73	374.62	2235.24	1954.88	1312.23	754.83	3231.73	1232.01	2688.37	200.94	2206.63	532.427	235.311	298.508	146.692	105.018	186.702	0.1	0.4	0.7	1	1.3	1.4	1.5
2022-01-09	566.15	595.33	372.95	2187.7	1909.48	1305.17	743.18	3177.54	1226.1	2634.31	196.36	2202.22	526.18	232.583	294.117	144.907	103.641	184.066	0.1	0.4	0.9	1.2	1.5	1.7	1.8
2022-01-16	566.27	594.33	382.28	2203.85	1917.57	1338.25	744.41	3173.12	1257.46	2635.78	195.55	2277.25	528.423	234.314	293.941	145.529	104.428	183.988	0.1	0.5	1	1.3	1.6	1.7	1.8
2022-01-23	542.22	566.53	378.39	2135.35	1858.38	1313.47	712.8	3025.1	1244.31	2535.13	187.33	2249.97	527.397	233.907	292.969	145.188	104.142	183.362	0.1	0.6	1	1.3	1.6	1.7	1.8
2022-01-30	535.73	561.51	364.72	2109.17	1836.37	1287.05	705.12	3005.63	1191.14	2502.63	185.79	2149.28	521.647	231.017	289.369	143.505	102.597	181.137	0.1	0.7	1.2	1.4	1.6	1.7	1.8
2022-02-06	546.36	572.3	372.72	2135.87	1859.87	1309.71	718.76	3061.46	1221.1	2548.82	188.96	2208.52	519.77	230.339	287.289	142.966	102.434	179.927	0.1	0.9	1.3	1.5	1.8	1.9	1.9
2022-02-13	544.63	569.27	377.92	2125.8	1849.79	1341.08	715.46	3039.18	1240.51	2526.29	186.71	2234.26	516.324	228.613	285.923	142.01	101.725	179.093	0.1	1	1.5	1.7	1.9	1.9	1.9
2022-02-20	535.58	559.1	376.05	2092.42	1816.31	1347.67	703.34	2983.59	1231.77	2486.16	183.45	2215.31	516.319	229.137	284.262	141.959	101.783	178.09	0.1	1	1.5	1.7	1.8	1.9	1.9
2022-02-27	531.23	557.87	359.07	2086.95	1819.11	1285.6	698.53	2980.2	1171.99	2463.61	182.98	2092.03	513.039	227.749	281.631	141.022	101.275	176.492	0.1	1.1	1.6	1.8	1.9	2	2
2022-03-06	517.06	542.01	350.27	2019.75	1756.72	1280.4	679.32	2896.52	1144.91	2397.9	178.13	2030	514.091	228.594	281.84	141.379	101.935	176.573	0.1	1	1.5	1.6	1.6	1.7	1.7
2022-03-13	504.74	531.79	331.86	1996.13	1739.24	1245.78	663.53	2840.05	1085.66	2342.79	174.68	1926.69	504.452	224.021	275.111	138.616	99.7929	172.507	0.1	1.1	1.8	1.9	1.9	2	2
2022-03-20	533.99	563.26	343.87	2099.17	1833.69	1280.97	701.46	3010.59	1122.98	2482.78	185.56	1999.87	503.001	222.738	276.542	138.261	99.2724	173.391	0.3	1.2	1.9	2.1	2.1	2.2	2.2
2022-03-27	539.49	569.62	344.54	2116.32	1847.04	1302.42	709.58	3049.11	1125.01	2503.22	187.14	2008.84	494.82	218.728	272.499	135.939	97.4522	170.915	0.3	1.6	2.3	2.5	2.5	2.6	2.5
2022-04-03	541.91	571.11	351.17	2131.88	1861.52	1313.77	712.67	3057.07	1145.85	2521.25	187.97	2052.18	496.75	219.062	275.36	136.475	97.5901	172.612	0.3	1.7	2.5	2.6	2.6	2.5	2.4
2022-04-10	533.59	561.74	347.2	2112.89	1848.05	1293.94	702.13	3012.19	1127.93	2479.67	184.88	2010.93	487.971	215.113	269.589	133.968	95.676	169.108	0.3	1.8	2.5	2.7	2.8	2.8	2.7
2022-04-17	524.89	552.9	341.96	2065.39	1806.34	1272.66	690.21	2959.67	1112.9	2428.83	180.98	1977.29	483.456	213.018	266.432	132.661	94.5798	167.219	0.3	1.7	2.5	2.7	2.8	2.8	2.8
2022-04-24	511	538.82	330.01	2017.83	1765.23	1243.82	671.63	2882.45	1075.6	2373.11	177.12	1904.49	476.865	210.07	262.843	130.894	93.2647	165.004	0.3	2	2.7	2.9	2.9	2.9	2.9
2022-05-01	497.27	522.84	328.98	1969.11	1724.09	1207.74	653.67	2795.62	1076.19	2319.72	172.45	1910.88	472.25	207.776	260.158	129.625	92.2194	163.323	0.3	2.1	2.7	2.9	3	3	2.9
2022-05-08	488.91	515.83	316.68	1934.62	1694.7	1172.34	643.67	2762.21	1031.5	2276.89	169.84	1820.95	466.296	204.968	256.885	128.005	90.9551	161.375	0.8	2	2.7	3	3.1	3.2	3.1
2022-05-15	478.64	504.62	308.38	1896.87	1663.93	1122.77	629.19	2701.33	1004.52	2228.45	166.21	1774.48	467.684	205.712	257.266	128.448	91.1701	161.598	0.8	1.9	2.6	2.8	2.9	2.9	2.9
2022-05-22	473.72	497.52	316.28	1885.09	1648.89	1157.81	621.89	2655.91	1035.31	2198.55	162.94	1825.63	472.306	207.938	259.065	129.688	92.3008	162.721	0.8	2	2.6	2.7	2.8	2.8	2.8
2022-05-29	496.78	523.88	319.34	1963.18	1721	1176.87	652.84	2802.59	1043.17	2306.71	171.79	1840.3	476.45	209.506	262.848	130.888	93.0795	165.089	0.8	2	2.5	2.6	2.7	2.8	2.7
2022-06-05	493.96	519.84	324.28	1948.33	1705.48	1181.17	649.16	2779.06	1060.74	2294.09	170.21	1877.23	470.549	206.418	260.786	129.346	91.727	163.822	0.8	2.1	2.7	2.9	2.9	3	2.9
2022-06-12	472	494.32	322.34	1857.91	1624.12	1148.19	620.31	2641.69	1054.64	2197.85	162	1881.26	459.921	201.027	254.749	126.141	89.0201	160.018	0.8	2.5	3.1	3.2	3.3	3.2	3.2
2022-06-19	445.01	464.74	308.42	1765.25	1543.99	1090.22	584.55	2485.77	1004.63	2081.97	153.34	1788.15	453.644	198.518	250.507	124.324	87.4438	157.396	1.6	2.8	3.2	3.4	3.3	3.3	3.2
2022-06-26	465.5	488.36	313.53	1850.88	1626.63	1082.82	612.67	2619.48	1011.18	2191.3	162.24	1812.5	458.226	200.574	252.628	125.628	88.7123	158.756	1.6	2.8	3.1	3.2	3.2	3.2	3.1
2022-07-03	455.6	477.32	307.8	1804.69	1587.71	1051.13	599.08	2559.95	992.84	2132.31	157.82	1764.32	460.443	201.44	253.212	126.198	89.0836	159.109	1.6	2.7	2.8	2.9	2.9	2.9	2.9
2022-07-10	462.24	485.41	308.66	1827.23	1607.88	1052.12	608.58	2603.62	999.57	2171.41	160.8	1785.8	455.294	198.824	251.237	124.762	87.9594	157.869	1.6	2.9	3.1	3.1	3.1	3.2	3.1
2022-07-17	454.47	478.51	297.29	1794.81	1577.88	1029.25	598.71	2568.64	961.85	2129.73	158.19	1712.24	455.709	198.466	252.586	124.894	88.0209	158.657	1.6	3.1	3.1	3.1	3	3	2.9
2022-07-24	469.01	494.48	305.2	1832.25	1609.76	1056.43	617.71	2650.82	990.37	2192.98	162.83	1765.43	462.766	201.57	257.34	126.952	89.659	161.628	1.6	3	3	2.9	2.8	2.8	2.8
2022-07-31	484.47	511.93	306.18	1890.17	1661.32	1077.77	637.72	2746.37	993.78	2261.92	168.7	1757.89	468.089	204.179	259.242	128.396	90.9134	162.828	2.3	2.9	2.9	2.8	2.7	2.7	2.7
2022-08-07	485.71	513.09	308.65	1894.58	1662.71	1100.81	639.53	2752.06	1002.87	2263.98	168.59	1778.03	464.016	202.578	256.902	127.192	89.9286	161.333	2.3	3.2	3.2	3.2	3	2.9	2.8
2022-08-14	499.8	528.43	314.12	1937.22	1701.18	1133.48	657.57	2834.51	1016.83	2323.6	173.17	1807.46	465.947	203.256	258.501	127.741	90.3132	162.348	2.3	3.3	3.2	3.2	3	2.9	2.8
2022-08-21	490.96	519.08	310.19	1907.85	1673.99	1122.71	646.81	2787.71	1001.46	2288.9	170.55	1776.21	456.995	198.818	253.717	125.176	88.0846	159.324	2.3	3.2	3.2	3.3	3.1	3.1	3
2022-08-28	476.54	502.41	312.62	1838.79	1610.05	1118.82	627.9	2694.62	1006.5	2213.59	164.09	1784.07	453.614	197.25	252.426	124.264	87.3918	158.499	2.3	3.3	3.4	3.4	3.2	3.1	3
2022-09-04	460.62	485.43	303.94	1784.71	1565.11	1080.14	606.98	2605.21	972.02	2136.5	158.38	1716.92	447.87	194.436	248.715	122.602	86.2081	156.205	2.3	3.4	3.4	3.4	3.3	3.3	3.2
2022-09-11	473.79	499.4	305.16	1829.74	1608.2	1088.49	622.92	2682.9	970.29	2193.85	163.25	1708.14	444.375	192.494	247.679	121.639	85.3973	155.577	2.3	3.6	3.6	3.6	3.4	3.4	3.3
2022-09-18	454.32	478.71	295.36	1760.84	1546.85	1058.25	597.59	2569.29	944.12	2099.33	155.88	1658.19	440.354	190.968	245.321	120.581	84.6521	154.089	2.3	4	3.9	3.8	3.6	3.6	3.5
2022-09-25	431.55	453.98	284.19	1678.07	1471.75	1036.81	567.86	2438.5	905.84	1997.19	148.13	1589.15	429.624	186.371	239.128	117.566	82.4252	150.189	3.1	4.1	4.2	4.2	4	3.9	3.7
2022-10-02	420.49	442.68	276.45	1645.04	1445.62	1000.15	553.37	2378.65	875.79	1951.36	144.83	1536.17	426.516	185.268	235.885	116.677	81.8371	148.214	3.1	4	4.3	4.3	4.1	4	3.8
2022-10-09	427.56	450.41	281.54	1673.68	1468.61	1025.37	563	2417.72	897.74	1976.27	146.45	1570.43	424.832	184.307	235.708	116.213	81.4413	148.134	3.1	4.2	4.3	4.3	4.1	4	3.9
2022-10-16	419.34	442.62	271.16	1655.88	1456.73	985.68	552.08	2376.64	863.33	1939.83	144.18	1505.44	418.805	181.597	232.251	114.547	80.0445	145.986	3.1	4.5	4.5	4.5	4.3	4.2	4
2022-10-23	432.41	457.32	272.84	1706.45	1504.88	997.79	569.93	2462.42	865.04	1991.31	148.59	1497.01	415.928	180.325	230.649	113.791	79.488	145.036	3.1	4.5	4.5	4.5	4.3	4.3	4.2
2022-10-30	446.79	475.86	265.77	1759.51	1557.45	991.5	588.95	2561.04	845.58	2065.46	155.22	1462.01	426.308	185.302	236.137	116.741	81.9455	148.464	3.1	4.5	4.4	4.4	4.2	4.1	4
2022-11-06	441.68	466.81	278.34	1731.84	1529.15	1022.31	580.6	2507.22	884.98	2041.11	152.21	1538.11	422.282	183.314	234.395	115.616	81.0587	147.399	3.8	4.7	4.7	4.6	4.3	4.3	4.2
2022-11-13	470.05	498.78	289.56	1847.04	1630.02	1066.28	618.66	2674.08	935.73	2182.18	162.77	1636.91	438.581	191.317	242.483	120.221	84.7873	152.466	3.8	4.6	4.3	4.2	3.9	3.9	3.8
2022-11-20	467.42	495.39	292.15	1857.51	1635.58	1069.75	616.04	2658.9	943.01	2176.24	161.79	1669.2	440.836	192.056	245.304	120.892	85.1312	154.194	3.8	4.7	4.5	4.3	4	3.9	3.8
2022-11-27	474.51	503.94	291.32	1890.63	1664.95	1084.29	625.15	2703.67	941.01	2215.88	165.06	1669.92	444.759	193.492	248.616	122.034	85.8944	156.237	3.8	4.7	4.5	4.2	3.9	3.8	3.7
2022-12-04	482.3	509.41	303.05	1916.96	1687.4	1112.35	633.54	2733.03	973.85	2253.34	167.46	1725.05	451.875	196.812	252.544	123.989	87.378	158.677	3.8	4.7	4.3	4	3.7	3.6	3.5
2022-12-11	470.76	496.58	303.37	1884.23	1659.87	1089.87	619.36	2662.86	978.28	2206.02	163.26	1740.49	451.554	196.613	252.48	123.857	87.2277	158.613	3.8	4.7	4.3	4.1	3.8	3.7	3.6
2022-12-18	461.16	486.32	297.56	1845.41	1626.28	1069.64	606.13	2606.01	957.3	2159.37	159.83	1698.59	451.143	195.794	253.052	123.727	86.7418	158.975	4.3	4.6	4.2	3.9	3.6	3.6	3.5
2022-12-25	460.64	486.16	295.6	1842.19	1623.77	1067.94	605.79	2605.19	954.78	2152.71	159.27	1698.46	447.425	194.813	249.696	122.67	86.0391	156.876	4.3	4.6	4.3	4.1	3.9	3.8	3.7
2023-01-01	460.73	485.71	298.28	1838.04	1620.22	1071.73	605.38	2602.69	956.38	2151.68	159.07	1703.66	445.915	194.194	248.6	122.231	85.6647	156.195	4.3	4.7	4.4	4.2	4	4	3.9
2023-01-08	470.37	494.54	307.21	1854.39	1633.43	1095.35	617.4	2649.76	988.68	2195.1	161.9	1765.49	452.116	196.584	252.488	123.881	86.802	158.65	4.3	4.7	4.3	4	3.7	3.6	3.6
2023-01-15	485.76	511.36	317.84	1915.6	1683.55	1141.31	638.08	2735.72	1029.84	2273.47	167.38	1850.15	460.764	200.801	257.022	126.264	88.6697	161.499	4.3	4.7	4.2	3.9	3.6	3.6	3.5
2023-01-22	485.01	509.56	319.89	1911.72	1678.7	1144.88	636.4	2725.4	1036.24	2269.86	166.87	1864.56	460.781	200.647	257.618	126.31	88.6862	161.849	4.3	4.7	4.2	3.8	3.6	3.5	3.5
2023-01-29	494.9	521.03	322.05	1935.6	1701.38	1144.69	649.94	2785.84	1051.19	2315.23	170.33	1890.1	460.626	200.29	258.234	126.265	88.5821	162.221	4.3	4.7	4.2	3.9	3.6	3.6	3.5
2023-02-05	499.54	527.57	318.85	1961.67	1720.05	1158.68	656.26	2820.74	1038.71	2341.15	172.63	1878.14	461.462	200.516	259.296	126.465	88.5955	162.87	4.6	4.8	4.3	4	3.7	3.6	3.5
2023-02-12	492.03	520.19	311.91	1941.58	1702.81	1135.94	646.87	2783.91	1013.67	2304.29	170.07	1833.18	453.935	197.263	254.486	124.35	86.9934	159.809	4.6	4.9	4.5	4.2	3.9	3.8	3.7
2023-02-19	491.31	519.4	308.96	1934.43	1699.02	1130.82	645.03	2779.88	999.42	2296.77	169.81	1796.64	449.611	194.973	252.644	123.151	85.9163	158.649	4.6	5	4.6	4.3	4	3.9	3.8
2023-02-26	478.14	505.92	301.03	1881.05	1651.4	1104.44	628	2706.91	971.87	2236.82	165.41	1742.58	444.257	192.597	249.659	121.67	84.7171	156.766	4.6	5	4.8	4.5	4.2	4.1	3.9
2023-03-05	487.73	515.32	307.03	1917.06	1685.74	1106.76	639.69	2757.97	988.03	2278.65	168.53	1766.12	444.363	192.559	250.081	121.672	84.5825	157.032	4.6	5	4.9	4.6	4.2	4.1	4
2023-03-12	469.39	496.33	297.34	1864.79	1637.87	1093.1	616.6	2657.41	955.28	2195.66	162.28	1705.07	450.185	195.702	252.722	123.385	86.2134	158.692	4.6	4.9	4.6	4.3	4	3.9	3.7
2023-03-19	468.39	495.04	294.81	1881.11	1653.26	1088.23	616.09	2656.19	951.56	2207.41	163.27	1697.46	457.592	199.771	254.101	125.418	88.1813	159.632	4.6	4.2	3.8	3.7	3.5	3.5	3.4
2023-03-26	474.45	501.58	300.11	1910.77	1677.98	1111.71	625.06	2692.55	972.17	2242.71	165.55	1748.18	461.037	201.335	256.573	126.403	88.8482	161.192	4.8	4.3	3.8	3.6	3.4	3.4	3.4
2023-04-02	490.54	519.93	305.54	1968.85	1732	1126.39	646.76	2791.44	990.28	2320.43	171.39	1788.12	459.323	200.174	257.207	125.93	88.3	161.564	4.8	4.6	4	3.8	3.6	3.5	3.5
2023-04-09	490.04	519.11	305.11	1990.52	1753.23	1128.16	646.31	2790.38	987.07	2316.31	171.1	1778.26	462.494	201.627	259.097	126.854	89.1266	162.741	4.8	4.6	4	3.7	3.5	3.5	3.4
2023-04-16	496.5	526.27	308.83	2005.82	1766.8	1151.81	654.57	2825.75	1000.49	2343.19	173.15	1790.79	460.31	200.226	258.459	126.192	88.3668	162.326	4.8	4.8	4.1	3.8	3.6	3.6	3.5
2023-04-23	495.29	525.52	302.86	1994.03	1759.19	1130.32	652.61	2823.07	980.74	2334.92	172.92	1751.69	457.947	198.933	257.787	125.531	87.7221	161.9	4.8	4.8	4.2	3.9	3.7	3.6	3.6
2023-04-30	496.55	527.46	302.85	2010.13	1775.99	1130.65	655	2835.93	977.05	2348.13	174.08	1738.94	461.349	200.302	260.247	126.517	88.4568	163.456	4.8	4.8	4	3.7	3.5	3.5	3.4
2023-05-07	495.27	525.19	304.08	2004.54	1769.55	1142.23	652.45	2821.99	981.66	2343.03	173.51	1746.16	462.043	200.837	259.373	126.678	88.7178	162.895	5.1	4.7	3.9	3.6	3.4	3.4	3.4
2023-05-14	492.05	522.5	301.76	1998.49	1764.27	1142.5	649.22	2809.35	973	2337.35	173.06	1732.32	459.909	199.945	258.195	126.086	88.2014	162.157	5.1	4.8	4	3.7	3.4	3.5	3.5
2023-05-21	497.77	528.73	301.43	2024.24	1783.97	1157.52	656.42	2842.76	977.24	2365.71	175.14	1745.81	452.983	196.609	254.608	124.147	86.6279	159.887	5.1	5	4.3	4	3.7	3.7	3.7
2023-05-28	494.55	525.51	299.17	2010.53	1767.43	1165.8	653.05	2827.93	972.86	2357.79	174.51	1737.12	448.035	194.087	252.746	122.75	85.2852	158.73	5.1	5.2	4.6	4.2	3.9	3.9	3.8
2023-06-04	502.56	534.45	302.94	2034.65	1789.65	1180.37	663.25	2873.37	984.36	2390.18	176.9	1755.03	453.177	196.388	255.656	124.191	86.4833	160.558	5.1	5.2	4.5	4.1	3.8	3.8	3.7
2023-06-11	505.64	537.27	307.34	2034.47	1786.99	1202.04	667.08	2885.63	1002.33	2401.61	177.41	1785.55	453.075	196.41	255.432	124.171	86.488	160.393	5.1	5.2	4.6	4.2	3.9	3.8	3.7
2023-06-18	518.89	551.2	315.89	2083.33	1829.33	1228.32	684.89	2962.34	1030.03	2474.52	182.64	1847.71	454.697	196.785	257.164	124.61	86.7704	161.486	5.1	5.2	4.7	4.3	4	3.9	3.8
2023-06-25	507.04	539.13	305.54	2041.46	1792.24	1206.16	669.76	2902.34	991.91	2415.34	178.61	1776.11	453.533	196.011	257.209	124.313	86.4974	161.531	5.1	5.3	4.7	4.3	4	3.9	3.7
2023-07-02	517.11	551.02	306.13	2061.72	1813.69	1193.29	682.84	2966.72	989.48	2459.8	182.36	1770.79	452.296	195.296	257.376	124.013	86.2879	161.636	5.1	5.4	4.9	4.5	4.2	4	3.8
2023-07-09	510.52	543.5	303.78	2020.26	1776.16	1185.68	673.44	2924.19	980.66	2427.64	179.78	1758.81	449.321	194.434	254.87	123.174	85.7527	160.05	5.1	5.4	4.9	4.7	4.4	4.2	4.1
2023-07-16	527.32	561.56	315.95	2105.68	1849.55	1243.59	696.22	3017.94	1028.49	2517.29	186.08	1848.82	459.554	199.071	260.417	126.016	88.1025	163.518	5.1	5.3	4.8	4.4	4	3.9	3.8
2023-07-23	528.63	563.26	313.16	2109.63	1858.04	1233.28	697.43	3028.71	1014.58	2512.82	186.11	1816.28	457.103	197.581	260.061	125.313	87.2859	163.294	5.1	5.3	4.8	4.4	4.1	4	3.8
2023-07-30	534.13	568.47	321.84	2125.23	1871.21	1249.47	705.51	3057.84	1043.2	2544.3	188.06	1865.7	455.822	197.042	259.348	124.947	86.9177	162.846	5.3	5.4	4.9	4.5	4.2	4.1	4
2023-08-06	522.34	555.42	315.63	2073.5	1826.13	1207.88	689	2986.54	1018.02	2485.53	183.59	1828.72	452.043	194.996	257.763	123.875	85.926	161.854	5.3	5.3	4.8	4.4	4.1	4.1	4
2023-08-13	518.69	552.58	309.97	2069.57	1824.41	1196.21	684.68	2972.73	997.72	2475.14	183.1	1794.8	448.604	193.371	256.078	122.912	85.1436	160.786	5.3	5.3	4.9	4.6	4.3	4.3	4.2
2023-08-20	505.22	538.1	300.78	2018.1	1779.13	1163.74	666.77	2897.5	964.44	2415.61	178.92	1727.27	445.142	191.796	254.036	121.95	84.3445	159.518	5.3	5.3	4.9	4.7	4.4	4.3	4.3
2023-08-27	508.07	540.68	302.41	2027.83	1786.38	1171.9	670.23	2911.99	971.04	2434.78	180.35	1738.12	444.771	191.419	254.438	121.824	84.021	159.773	5.3	5.4	5.1	4.7	4.4	4.4	4.2
2023-09-03	520.43	555.28	306.68	2065.39	1820.41	1185.8	687.26	2989.51	985.68	2494.61	185.01	1757.24	447.329	192.477	255.826	122.546	84.6133	160.64	5.3	5.4	4.9	4.6	4.3	4.3	4.2
2023-09-10	513.69	547.27	304.23	2049.1	1807.76	1162.91	678.02	2948.81	973.86	2466.28	182.9	1734.48	443.587	190.534	254.526	121.55	83.728	159.821	5.3	5.4	5	4.7	4.4	4.4	4.3
2023-09-17	516.23	549.92	306.66	2066.02	1819.22	1189.24	681.34	2960.98	984.99	2474.36	183.23	1756.72	442.345	189.855	253.738	121.147	83.2984	159.322	5.3	5.4	5	4.7	4.5	4.4	4.3
2023-09-24	502.21	534.65	301.17	2013.39	1775.67	1158.12	663.14	2879.85	964.24	2399.86	177.51	1718.58	440.172	188.866	252.944	120.571	82.8884	158.828	5.3	5.5	5.1	4.8	4.6	4.5	4.4
2023-10-01	497.46	529.56	298.99	1992.49	1757.82	1144.58	656.82	2853.24	952.78	2380.04	176.02	1696.95	436.075	187.146	250.355	119.439	82.0979	157.204	5.3	5.5	5	4.8	4.6	4.6	4.6
2023-10-08	495.2	526.95	294.79	1992.6	1757.67	1134.2	654.04	2845.23	937.34	2378.39	176.16	1672.53	431.602	185.247	247.282	118.188	81.216	155.292	5.3	5.4	5.1	4.9	4.8	4.8	4.8
2023-10-15	498.02	529.81	298.19	2009.3	1768.91	1161.13	658.54	2862.14	951.31	2392.55	176.96	1700.12	434.588	186.527	249.534	119.03	81.8113	156.696	5.3	5.4	5.1	4.8	4.6	4.7	4.6
2023-10-22	485.37	516.7	289.98	1977.42	1739.9	1136.23	642.07	2791.24	925.58	2327.07	172.15	1649.65	430.205	184.914	246.266	117.82	81.1953	154.653	5.3	5.4	5.1	4.9	4.9	4.9	4.9
2023-10-29	476.1	505.94	289.33	1934.98	1702.77	1128.01	629.46	2731.99	919.78	2281.4	168.43	1641.94	432.031	185.525	247.746	118.311	81.3703	155.579	5.3	5.4	5	4.8	4.8	4.8	4.8
2023-11-05	501.3	534.1	296.93	2024.73	1784.72	1153.1	662.77	2883.8	948.26	2406.44	178.11	1695.09	440.389	188.764	253.146	120.609	82.9537	158.968	5.31	5.284	4.841	4.64	4.504	4.561	4.573
2023-11-12	503.33	536.45	296.68	2034.3	1793.46	1155.77	666.26	2900.76	948.32	2423.12	179.54	1688.39	438.463	187.879	252.361	120.053	82.3545	158.48	5.31	5.381	5.063	4.84	4.686	4.713	4.653
2023-11-19	518.41	552.65	305.03	2087.61	1837.02	1198.39	685.7	2985.19	976.52	2497.82	184.98	1739.9	446.931	191.684	257.491	122.423	84.2577	161.697	5.31	5.243	4.887	4.622	4.443	4.47	4.436
2023-11-26	522.98	558.04	306.61	2114.88	1863.24	1202.86	692.15	3015.19	980.33	2524.57	187	1752.14	447.677	191.894	258.218	122.596	84.3779	162.155	5.31	5.272	4.951	4.666	4.486	4.508	4.468
2023-12-03	528.43	563.19	307.94	2132.18	1878.14	1216.21	697.51	3040.7	982.14	2542.58	188.52	1745.94	454.26	194.425	262.778	124.439	85.6303	165.046	5.31	5.025	4.54	4.298	4.125	4.201	4.197
2023-12-10	527.96	564.47	305.97	2135.74	1882.81	1208.49	698.32	3047.21	975.01	2541.6	188.64	1727.17	455.549	195.284	263.129	124.832	86.0626	165.245	5.31	5.128	4.722	4.459	4.24	4.269	4.227
2023-12-17	541.87	579.63	313.2	2171.21	1912.06	1237.27	716.45	3126.14	1000.89	2605.12	193.23	1776.92	466.669	200.193	270.147	127.945	88.5178	169.632	5.31	4.957	4.446	4.121	3.91	3.939	3.912
2023-12-24	545.95	584.73	309.99	2189.72	1936.62	1217.65	721.18	3152.26	992.28	2624.02	195.16	1748.85	469.125	201.424	271.041	128.629	89.1787	170.178	5.31	4.833	4.324	4.038	3.873	3.911	3.896
2023-12-31	550.6	588.31	318.93	2209.29	1946.75	1261.87	727	3169.18	1023.74	2648.04	196.34	1808.52	471.4	202.31	272.481	129.247	89.5942	171.098	5.31	4.773	4.251	4.01	3.848	3.882	3.88

## Sheet: data_des
var	name	ticker
st_dj_all	Dow Jones Global Index	W1DOW Index
st_dj_dm	Dow Jones Developed Markets Index	W3DOW Index
st_dj_em	Dow Jones Emerging Markets Index	W5DOW Index
st_dj_all_esg	Dow Jones Sustainability World Index	W1SGI Index
st_dj_dm_esg	Dow Jones Sustainability Developed Markets Index	W3SGI Index
st_dj_em_esg	Dow Jones Sustainability Emerging Markets Index	DJSEMUP Index
st_ms_all	MSCI ACWI Index	MXWD index
st_ms_dm	MSCI World Index	MXWO index
st_ms_em	MSCI Emerging Markets Index	MXEF index
st_ms_all_esg	MSCI ACWI ESG Leaders Index	M1WDESR index
st_ms_dm_esg	MSCI World ESG Leaders Index	GSIN index
st_ms_em_esg	MSCI Emerging Markets ESG Leaders Index	M1EFESR index
bd_bb_all	Bloomberg Global-Aggregate Total Return Index	LEGATRUU Index
bd_bb_tr	Bloomberg Global-Aggregate Treasuries Total Return Index	LGTRTRUU index
bd_bb_co	Bloomberg Global Aggregate Corporate Total Return Index	LGCPTRUU Index
bd_bb_all_esg	Bloomberg MSCI Global Aggregate ESG Weighted Total Return Index	I29766US Index
bd_bb_tr_esg	Bloomberg MSCI Global Treasury ESG Weighted Index	I36244US Index
bd_bb_co_esg	Bloomberg MSCI Global Corporate ESG Weighted Index	I29762US Index
us_ffr	Fed Funds Rate	FDFD Index
us_tr_1y	US Treasury 1Y	GB12 Govt
us_tr_2y	US Treasury 2Y	GTUSD2Y Govt
us_tr_3y	US Treasury 3Y	GTUSD3Y Govt
us_tr_5y	US Treasury 5Y	GTUSD5Y Govt
us_tr_7y	US Treasury 7Y	GTUSD7Y Govt
us_tr_10y	US Treasury 10Y	GTUSD10Y Govt
